# Supplementary material for: Size regulation of multiple organelles competing for a limiting subunit pool
Source: PubMed Central journal article supplement (PMC9246132; doi:10.1371/journal.pcbi.1010253), 2022-06-17
Supplement: pcbi.1010253.s004.pdf [file pcbi.1010253.s004.pdf]

### S4 Text. Size dependent growth of multiple structures

The results shown for two structures in our study can be generalized to multiple structures. Let us consider  $M > 2$  structures growing from a shared pool of  $N$  subunits in total. The growth rates for  $i^{th}$  structure are given by-

$$\begin{aligned} K_i^{\text{on}}(\{n_i\}) &= k_i^+(N - \sum_{i=1}^M n_i)(1 + n_i)^{-\alpha} \\ K_i^{\text{off}}(\{n_i\}) &= k_i^- n_i^\beta, \end{aligned} \quad (1)$$

where  $i = 1, \dots, M$ . The probability of finding the system in a particular state  $\{n_i\}$  at time  $t$  is given by  $P(n_1, n_2, \dots, n_M, t)$ . The master equation can be written considering the rate of change of probability  $P(n_1, n_2, \dots, n_M, t)$  to be equal to the influx of probabilities in this state  $P(n_1, n_2, \dots, n_M, t)$  from  $2M$  different adjacent states, subtracted by the outflux of probabilities to those  $2M$  states (S7 Fig).

The steady state joint probability can be obtained using the  $M$  detailed balance relations given by

$$k_i^- n_i^\beta P(\dots, n_i, \dots) = k_i^+ n_i^{-\alpha} \left( N - \left( \sum_{i=1}^M n_i - 1 \right) \right) P(\dots, n_i - 1, \dots). \quad (2)$$

Using the above equation (Eq. 2) recursively, the steady state joint distribution can be calculated to be

$$P(n_1, n_2, \dots, n_M) = (\kappa_1^{n_1} \dots \kappa_M^{n_M}) \left( \frac{N!}{(N - \sum_{i=1}^M n_i)!} \right) \left( \frac{1}{(n_1!)^{\alpha+\beta} \dots (n_M!)^{\alpha+\beta}} \right) P(0, 0, \dots, 0) \quad (3)$$

where  $P(0, 0, \dots, 0)$  is the normalization constant and  $\kappa_i = \frac{k_i^+}{k_i^-}$ . The marginal distribution for any  $i^{th}$  structure  $P(n_i)$  can be calculated by summing over the other structures, for example

$$P(n_1) = \sum_{n_2=0, S_n \leq N}^N \sum_{n_3=0, S_n \leq N}^N \dots \sum_{n_M=0, S_n \leq N}^N \left( \frac{(\kappa_1^{n_1} \dots \kappa_M^{n_M}) N!}{(N - \sum_{i=1}^M n_i)!} \right) \left( \frac{1}{(n_1!)^{\alpha+\beta} \dots (n_M!)^{\alpha+\beta}} \right) \quad (4)$$

where  $S_n = \sum_{i=1}^M n_i$ . This sum becomes computationally very expensive as the number of summations to be computed goes as  $N^M$ . It is important to note that the growth model of more than 2 structures does not change the mathematical form of the size distribution, but only adds additional terms in the product. Thus we do not expect the results to change qualitatively for  $M > 2$ . We computed the size distribution for up to four ( $M = 4$ ) identical structures ( $\kappa_i = \kappa$  for any  $i^{th}$  structure) and checked the characteristics of the size distributions in the three feedback regimes

using the marginal size distribution (Eq. 4). For  $\alpha + \beta = 0$ , there is no size-dependent feedback of growth, and the size distribution exhibits fluctuations (standard deviation) of the same order as the mean size (S8A-C Fig). With increasing number of structures the size distribution becomes exponential in nature. In the regime of robust size regulation,  $\alpha + \beta > 0$ , the size distribution has well defined mean for any number of structures (S8D-F Fig). In the regime of autocatalytic growth,  $\alpha + \beta < 0$ , we observe bistability in size for any number of structures (S8G-I Fig). The mean size decreases when we increase number of structures growing from a shared pool keeping the pool size ( $N$ ) fixed.

---
