# Supplementary material for: Size regulation of multiple organelles competing for a limiting subunit pool
Source: PubMed Central journal article supplement (PMC9246132; doi:10.1371/journal.pcbi.1010253), 2022-06-17
Supplement: pcbi.1010253.s007.pdf [file pcbi.1010253.s007.pdf]

### S7 Text. Bistable size distribution from autocatalytic growth

**Kip-3 and tubulin limiting pool model.** In a recent study by Rank *et al* [1], it was demonstrated how Kip-3 motors that disassemble microtubules subunits (the tubulin dimers) from the plus-end give rise to bistable microtubule length distribution. Here, we show how this mechanism is related to our model in the limit  $\alpha + \beta < 0$ , where we find bistable size distribution due to autocatalytic growth from size-dependent positive feedback and negative-feedback from the limiting pool. In Rank *et al*'s study, the assembly rate is given by

$$K_{\text{on}} = \gamma_0 \left( c_T - \frac{L}{\delta_L V} \right) \quad (1)$$

where  $L$  is the filament,  $V$  is the cell/system volume,  $c_T = N/V$  is the initial subunit density, and  $\delta_L$  is the subunit length. The volume  $V$  was considered to be an accessible area around the microtubule from where the motors can bind [1] but here we consider well mixed solution and take  $V$  to be the volume of the cell/system. Varying the value of  $V$  did not change the qualitative results in the original study [1]. The constant  $\gamma_0$  is the same as the bare assembly rate,  $k^+$ , in our description. Disassembly occurs at the microtubule plus-end, when a Kip-3 motor reaches the end and falls off with a subunit. Thus the disassembly rate is given by

$$K_{\text{off}} = \rho_+(t) \Delta \quad (2)$$

where  $\rho_+(t)$  is the probability that the plus-end has a motor at time  $t$ , and  $\Delta$  is the dissociation rate in the presence of a motor. The estimate of the probability leads to the following expression [1] for the disassembly rate

$$\rho_+(t) \Delta = \frac{w_A L}{\delta_L} - \left( \frac{(w_A + w_D) w_A L^2}{2\delta_L^2 v} \right), \quad (3)$$

where  $w_A$  and  $w_D$  are the rates at which Kip-3 motors bind and unbind from the filament, respectively, and  $v$  is the rate at which motors move towards the plus end of the microtubule. The binding rate  $w_A$  depends on the cytosolic motor density  $c_m$  as  $w_A = w_A^0 (c_m - m/V)$ , where  $w_A^0$  is a constant,  $m$  is the abundance of bound motors, and  $V$  is the system volume. Given that the bound motor abundance equilibrates very fast compared to the microtubule growth dynamics [1], we can assume that  $w_A$  is constant. The length dynamics of microtubules are described by the following equation

$$\dot{L} = \delta_L (K_{\text{on}} - K_{\text{off}}). \quad (4)$$

The length here is  $L = n\delta_L$  where  $n$  is the number of tubulins in the filament. The subunit density is  $c_T = \frac{N}{V}$ , where  $N$  is the total subunit pool size and  $V$  is the system size. Now the length dynamics can be re-written in terms of the subunit number as follows,

$$\dot{n} = k^+ \left( \frac{N_{av}}{V} \right) + C_1 n^2 - C_2 n, \quad (5)$$

where  $C_1 = \frac{w_A(w_A+w_D)}{2v}$  and  $C_2 = w_A$ . The above equation approximately maps to our size-dependent growth model with  $\alpha = -2$  and  $\beta = 1$ , belonging to the regime  $\alpha + \beta < 0$ . We have shown that in this regime our model exhibits bistable size distribution, which agrees with the reported results of Rank et al. Interestingly this model has a regime where the positive feedback is very weak (i.e.,  $\frac{k^+ N_{av}}{V} \gg C_1 n^2$ ). In this regime, microtubule growth can be mapped to our model with  $\alpha = 0, \beta = 1$ , leading to robust length control for multiple microtubule filaments competing for a limiting pool. This is consistent with the absence of bistability in low motor concentrations [1]. However our reduced description here cannot capture the observed monostability at high motor concentration and a more detailed analysis is required to address this issue.

### Reference

- [1] Rank M, Mitra A, Reese L, Diez S, Frey E. Limited Resources Induce Bistability in Microtubule Length Regulation. *Phy rev lett.* 2018;120(148101):1301–1305.
