# Supplementary material for: Size regulation of multiple organelles competing for a limiting subunit pool
Source: PubMed Central journal article supplement (PMC9246132; doi:10.1371/journal.pcbi.1010253), 2022-06-17

● unstable ● stable ● saddle-point

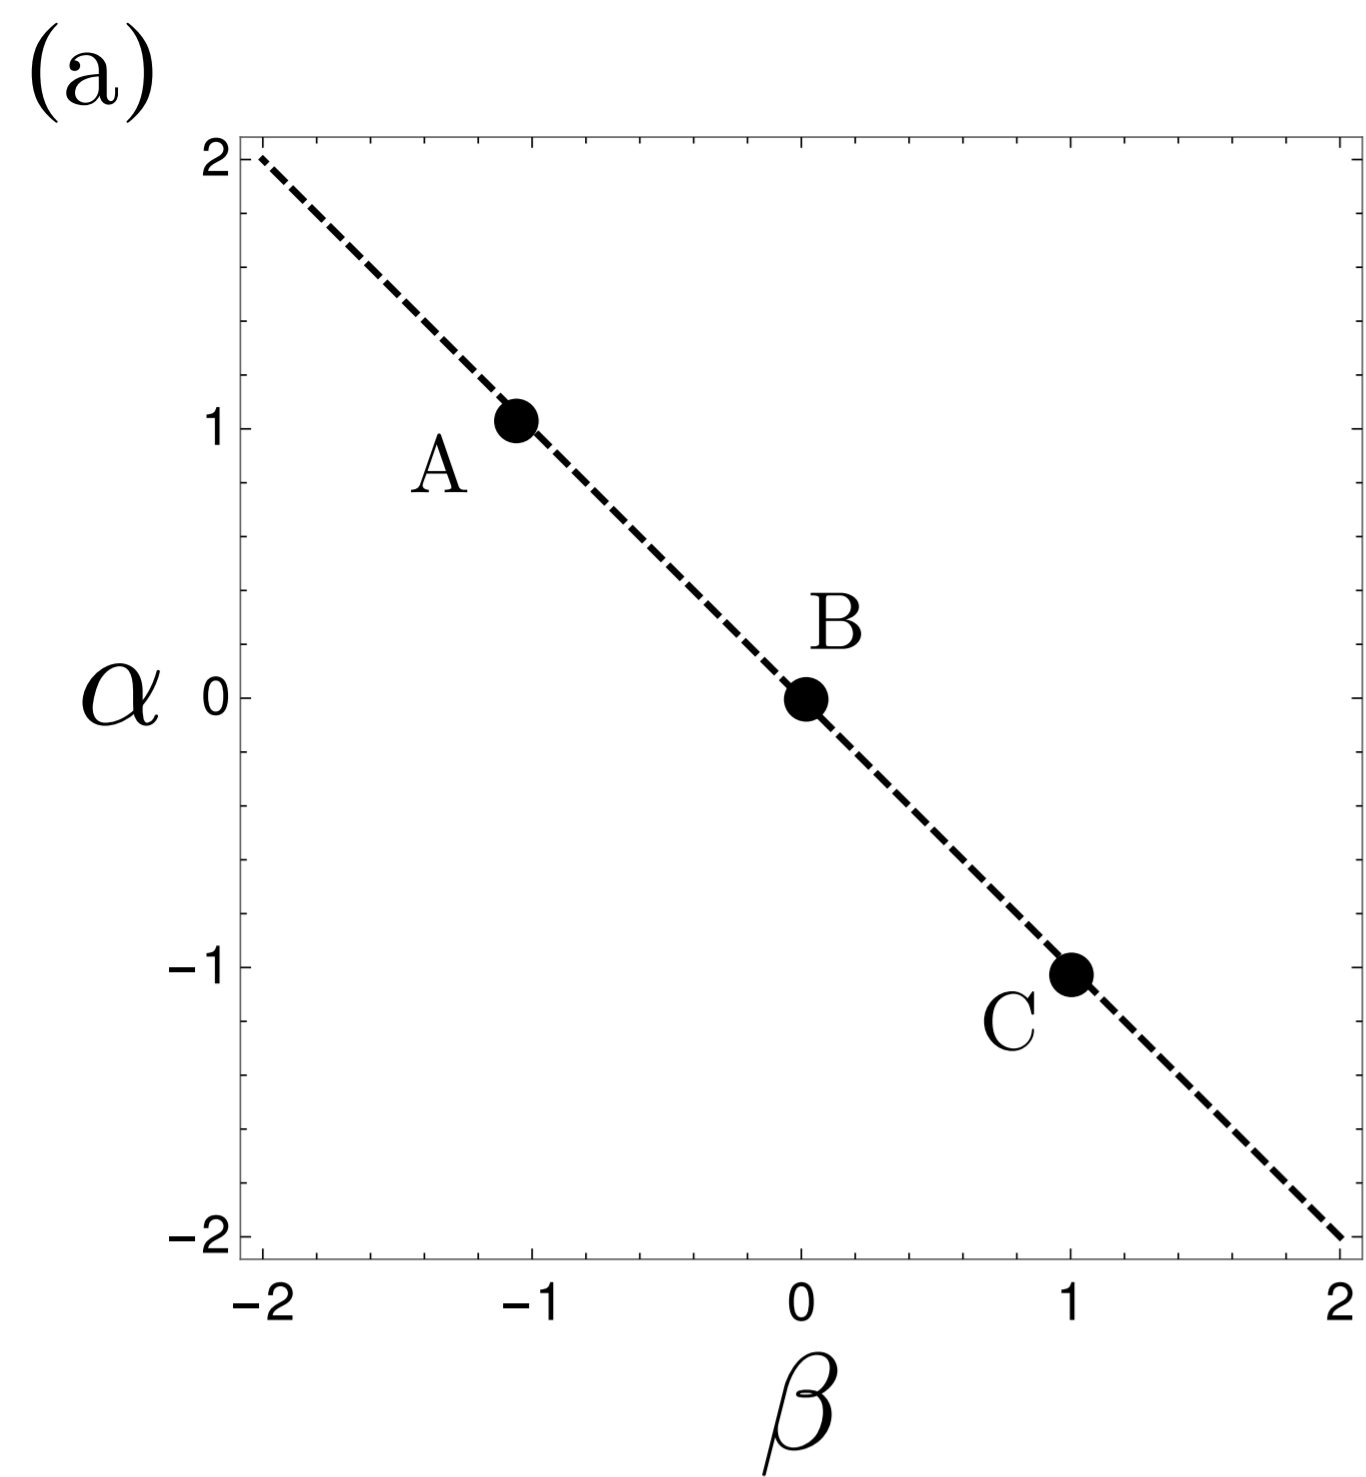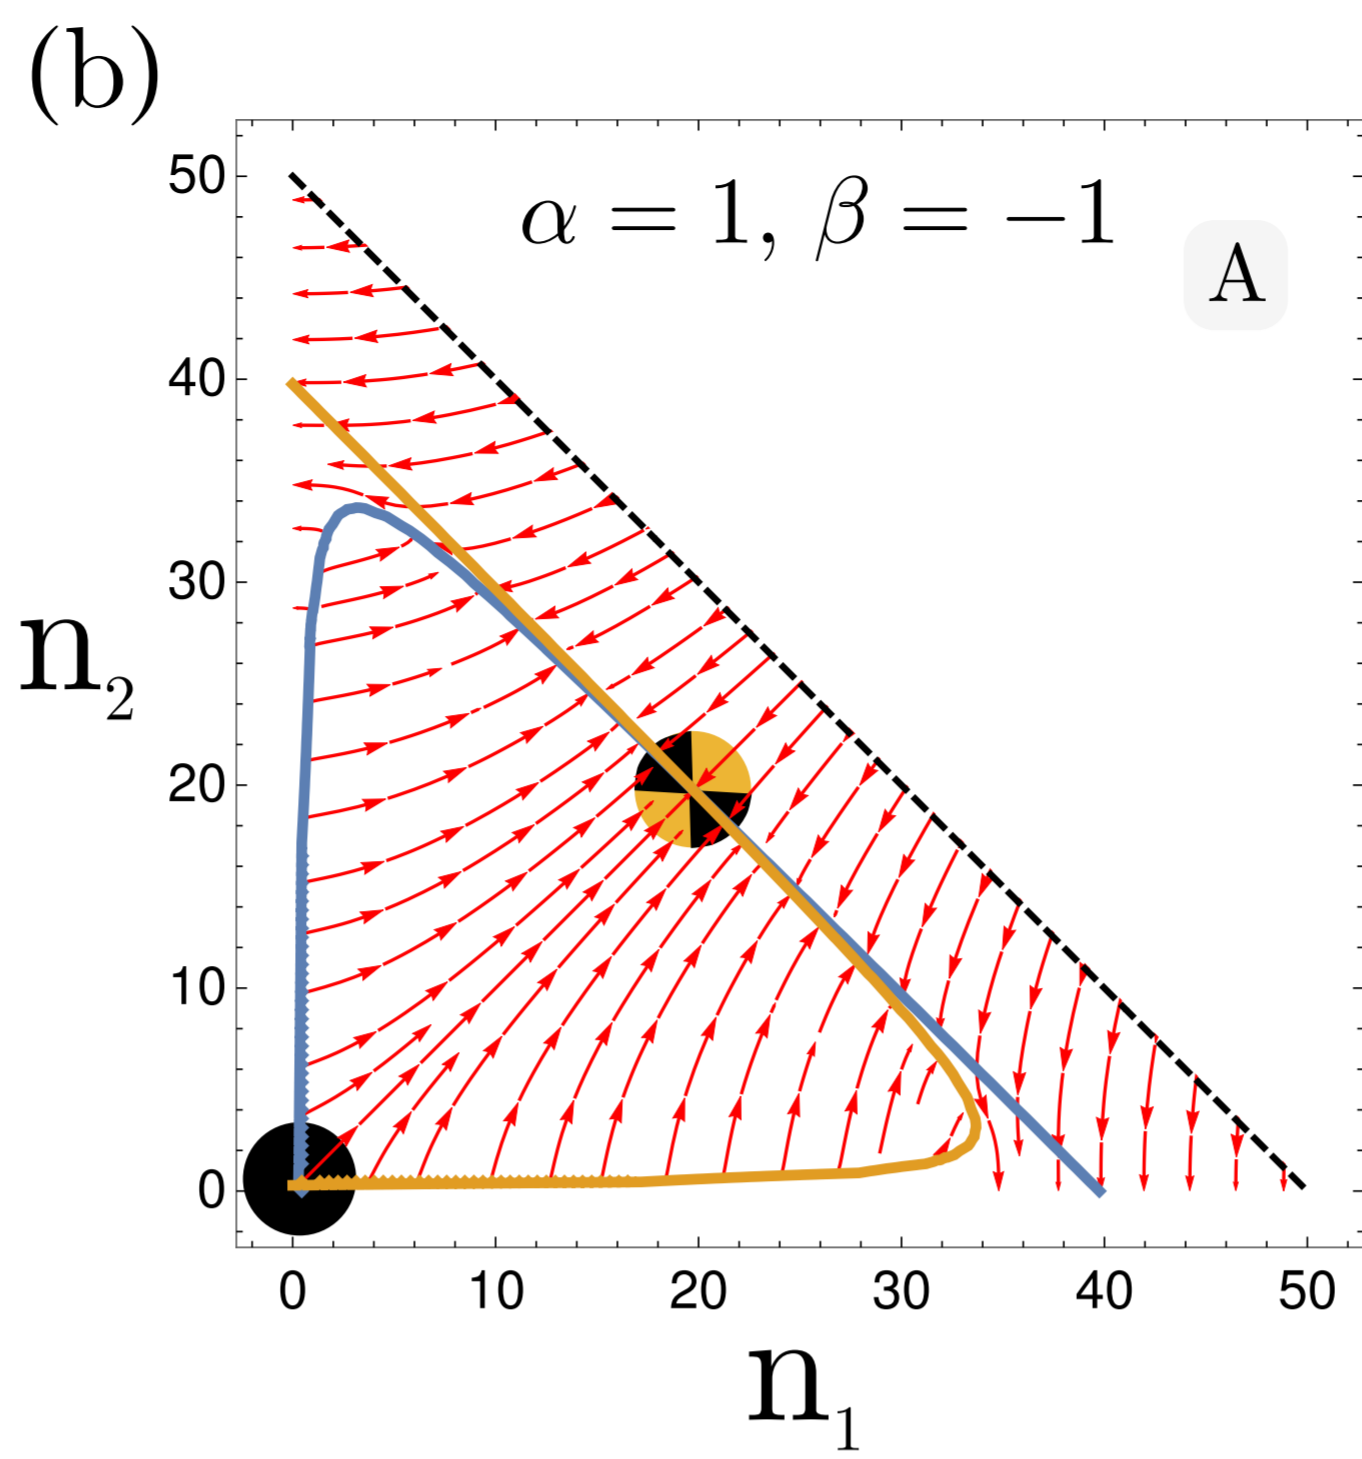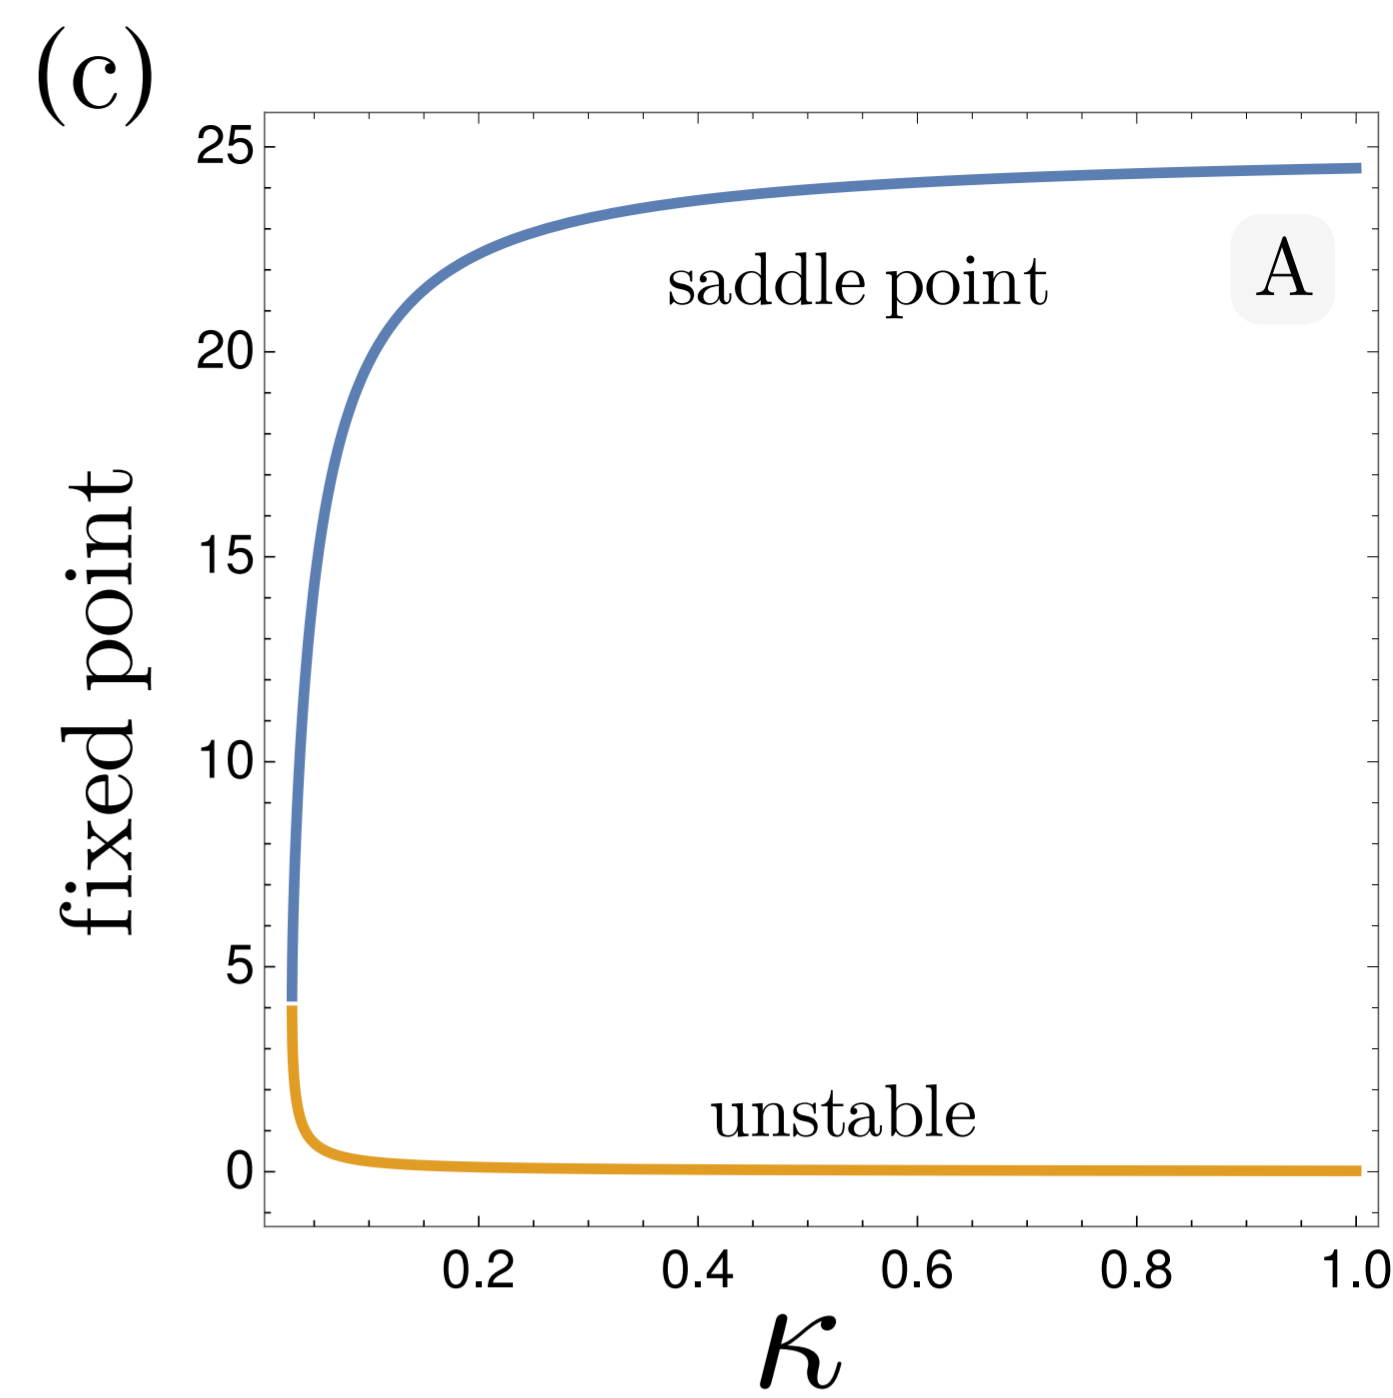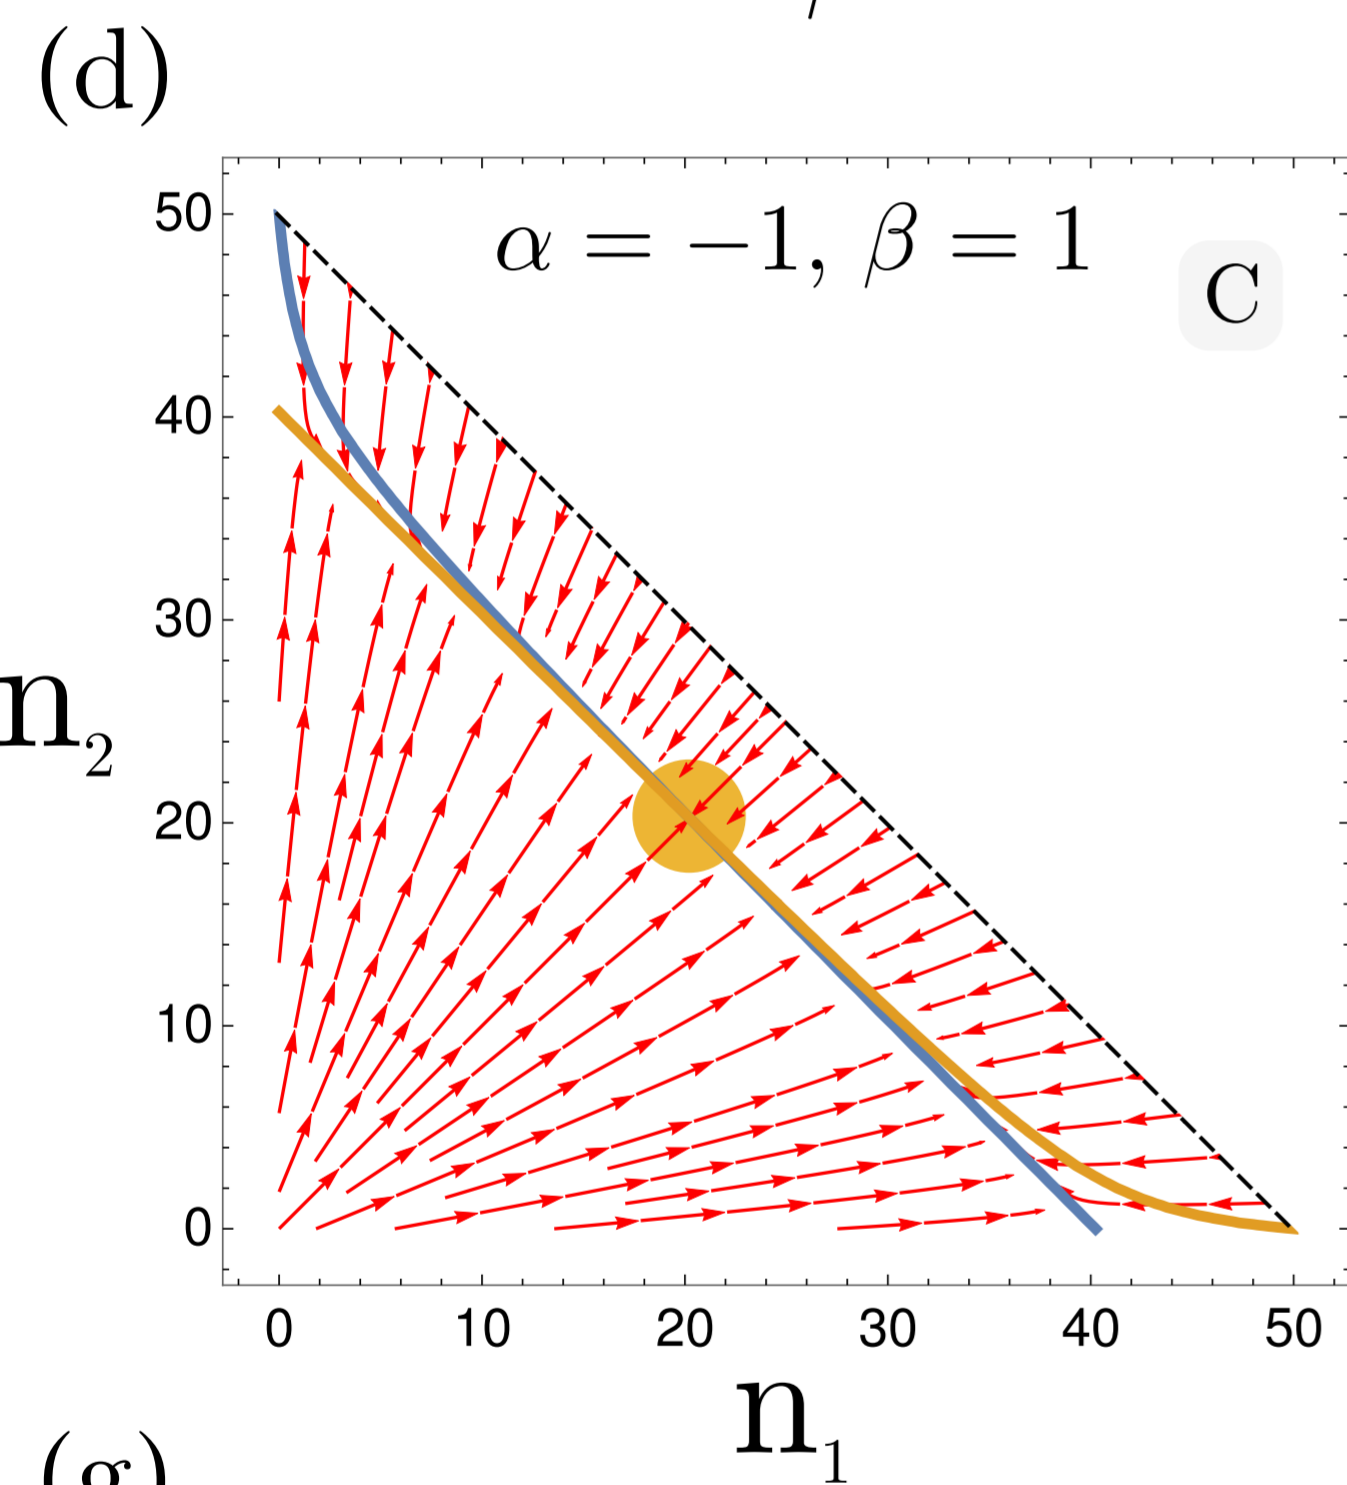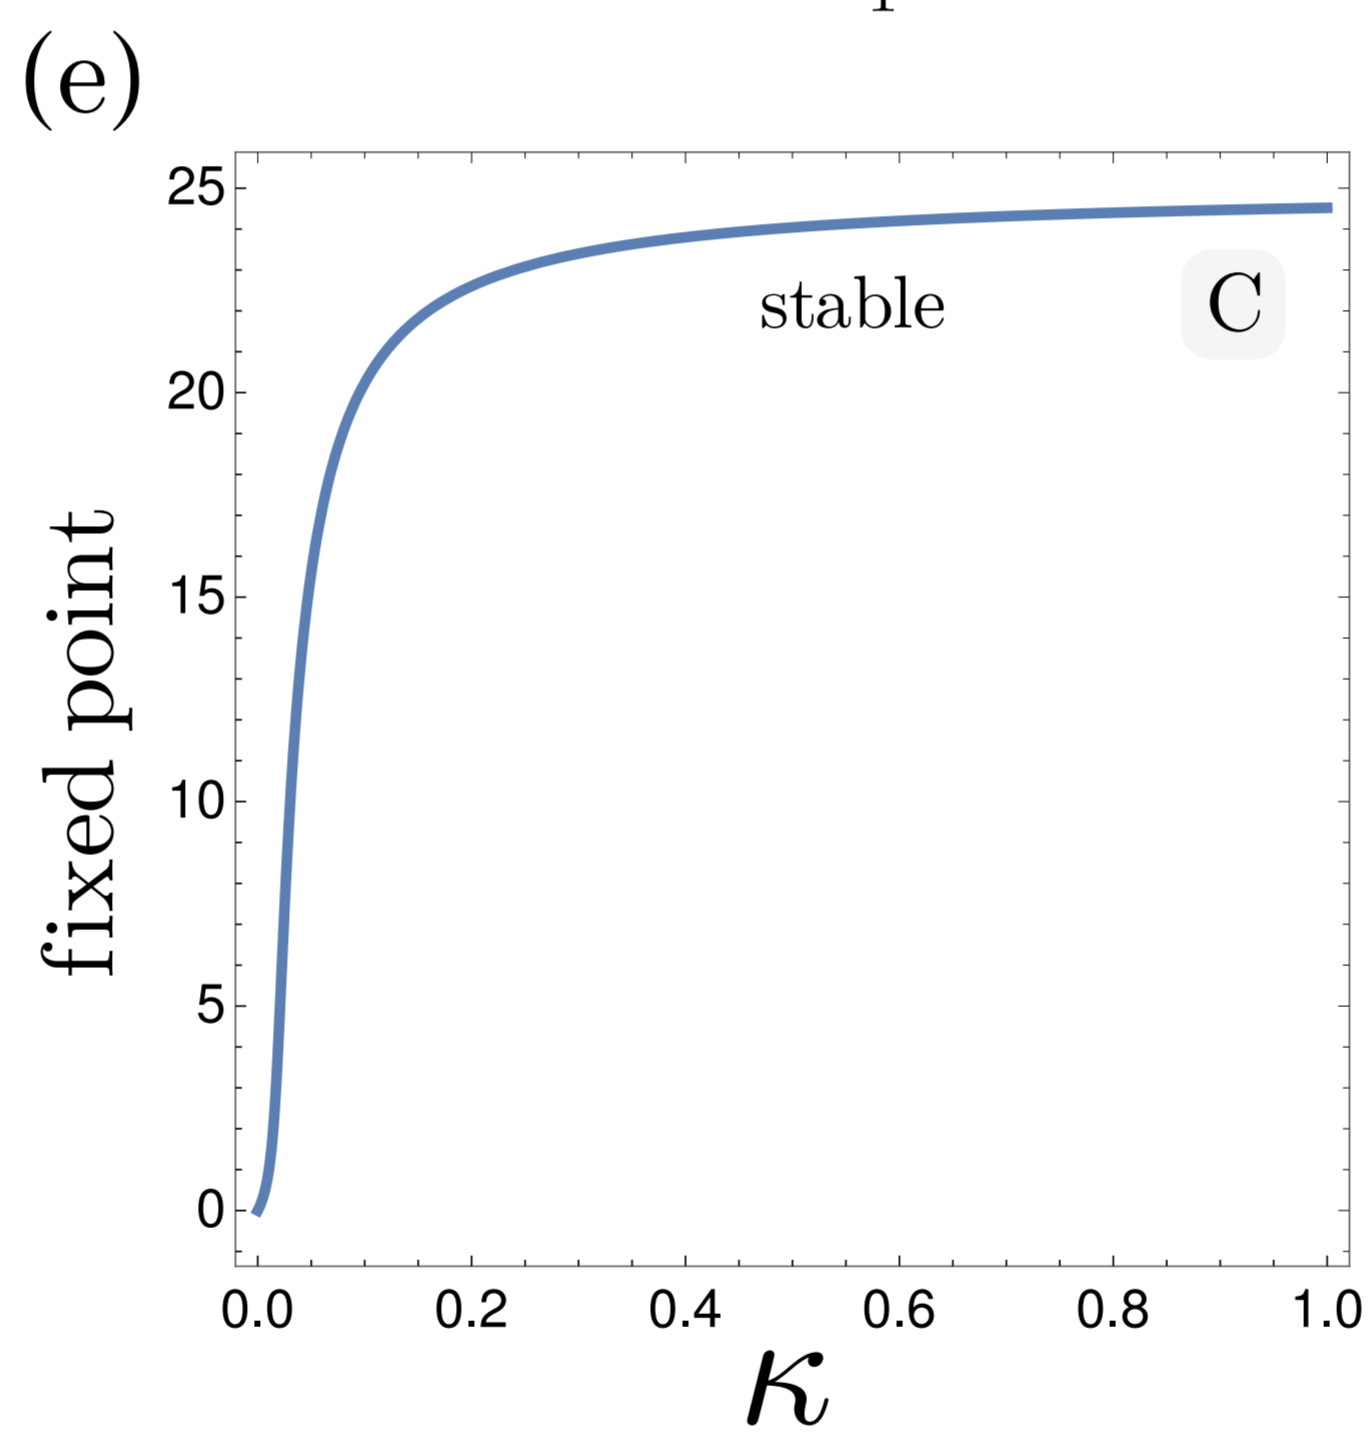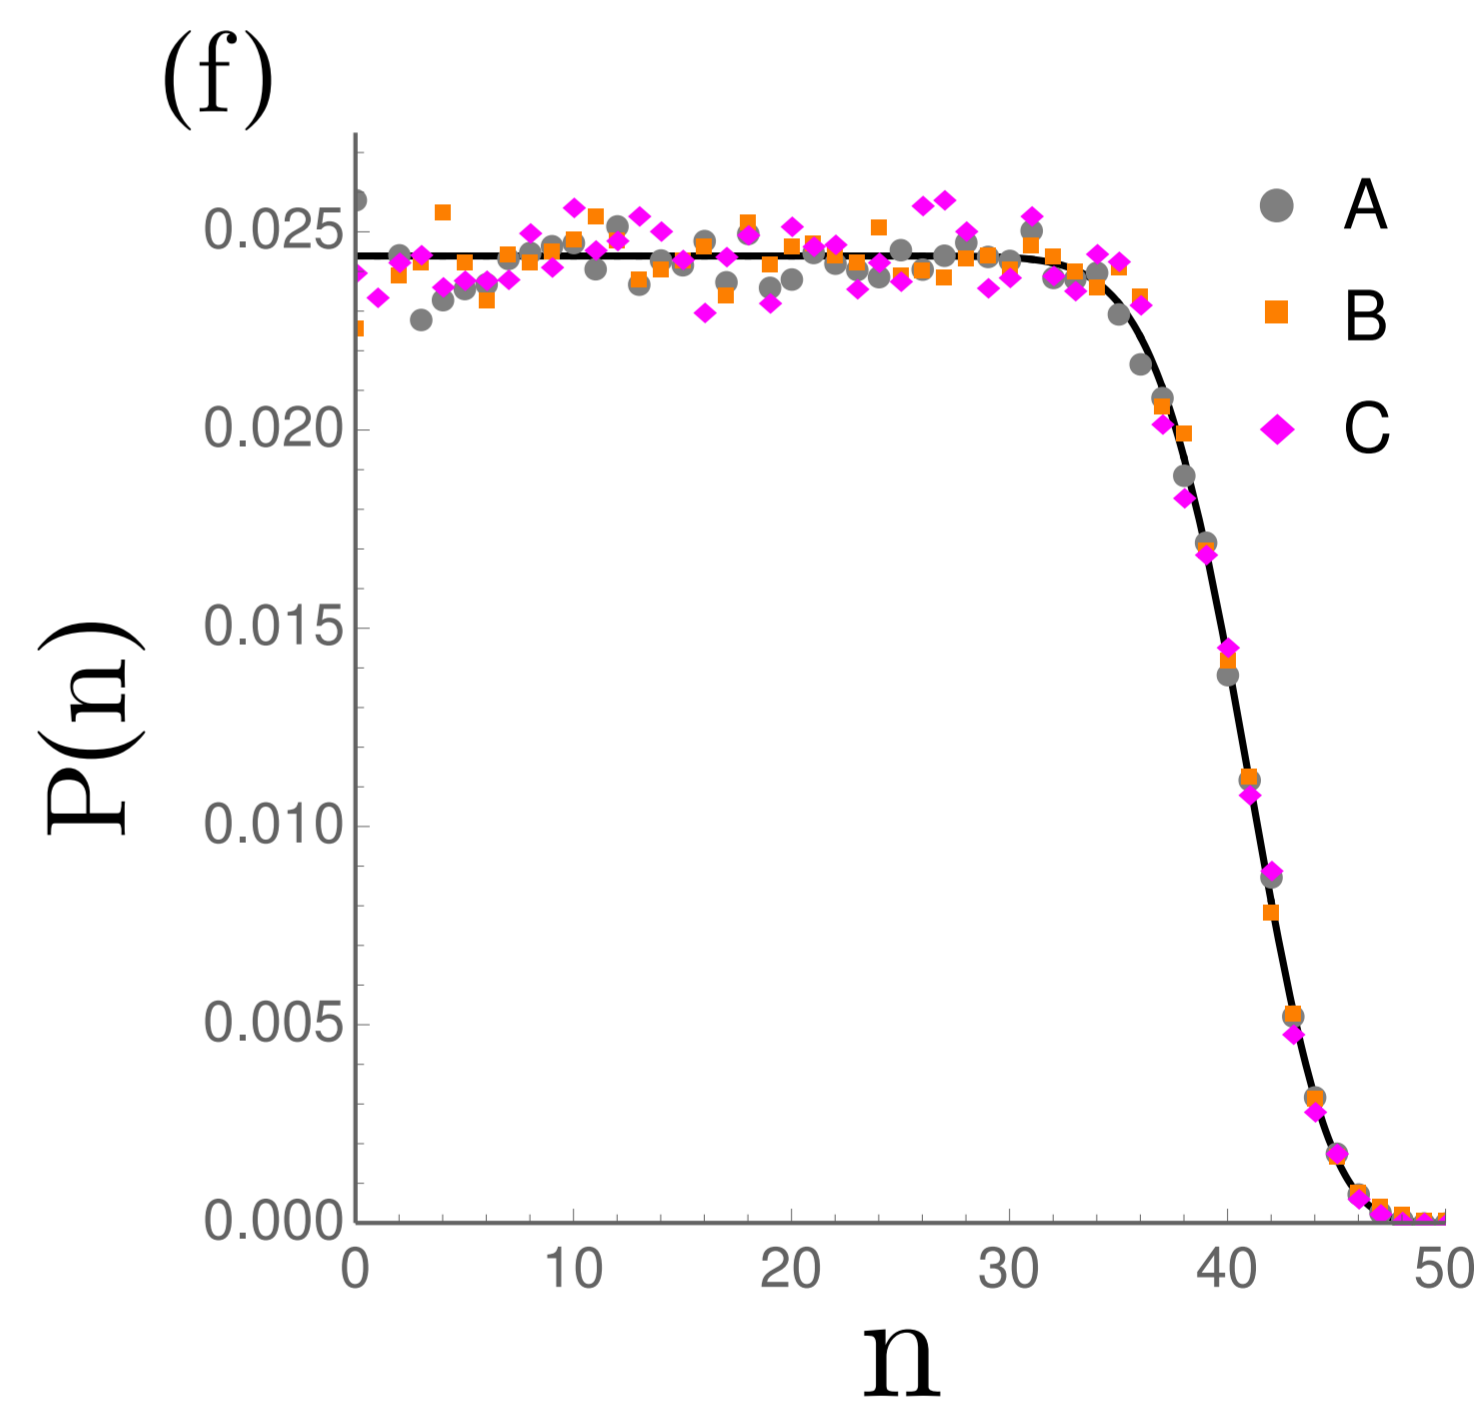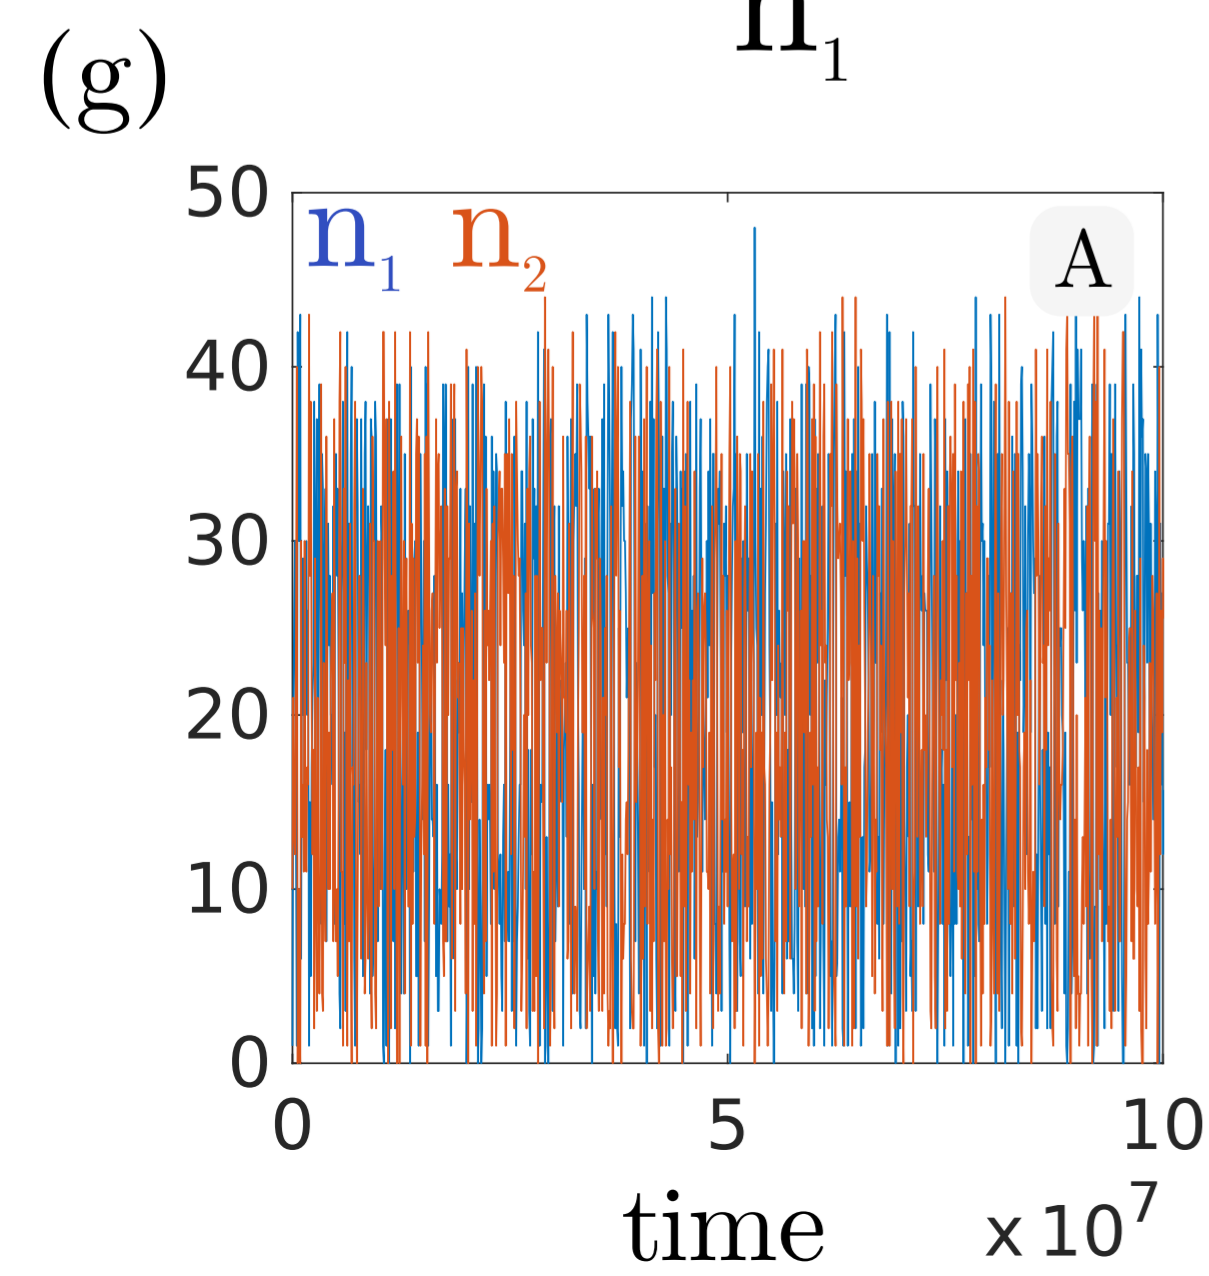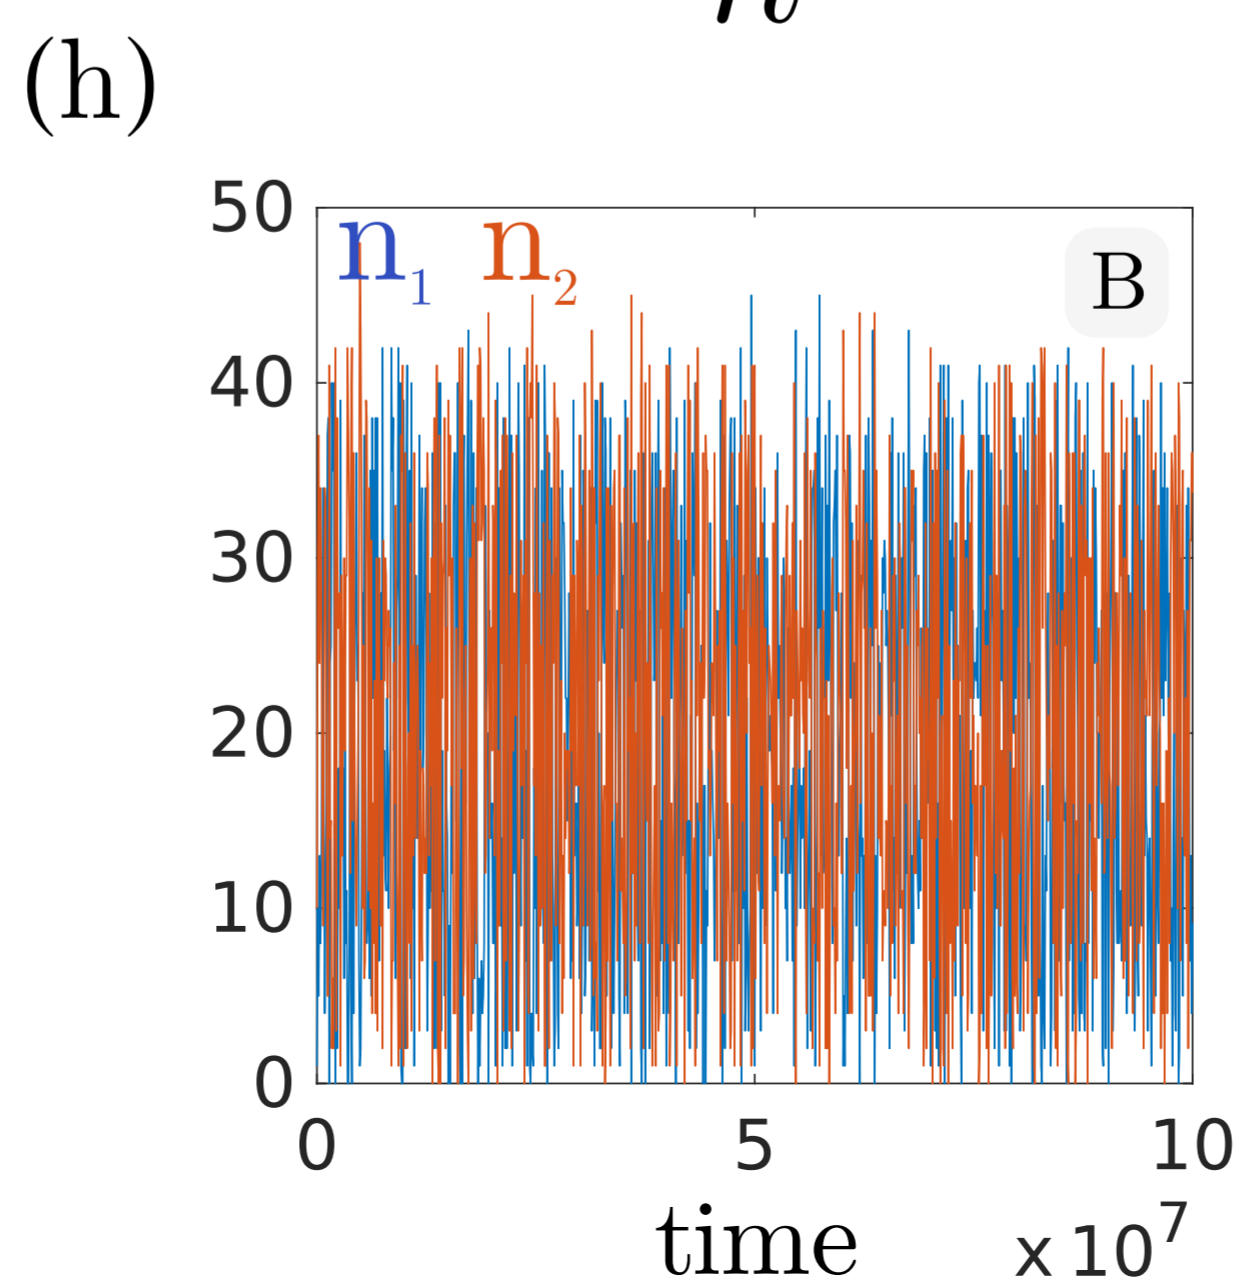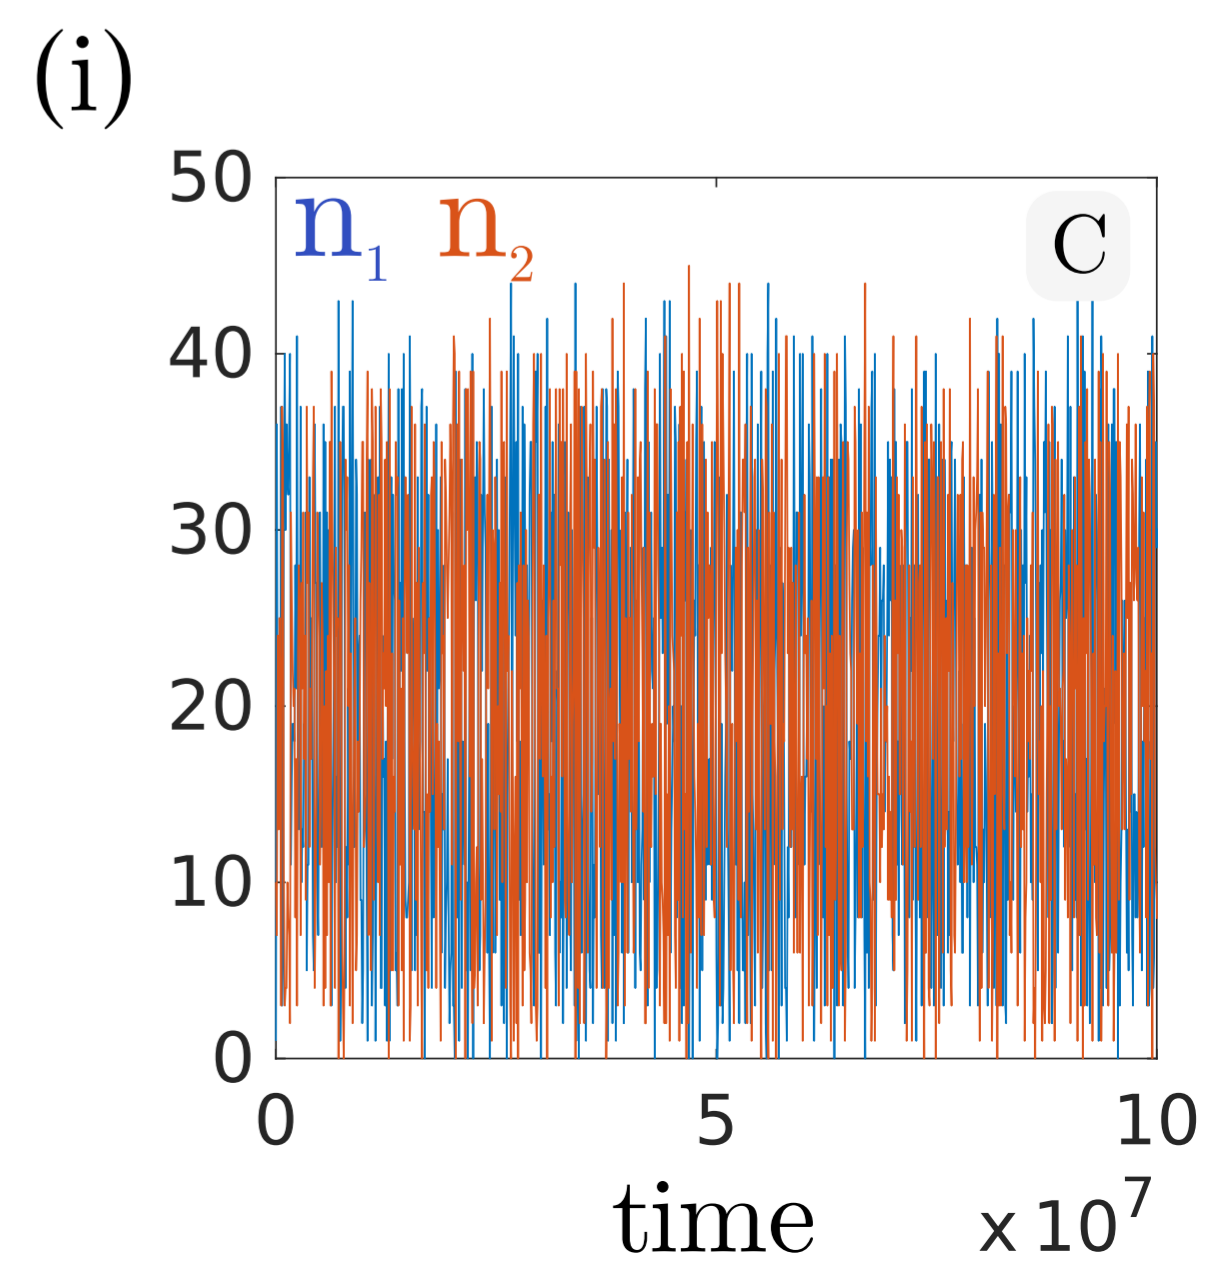

Supplement: pcbi.1010253.s010.pdf [file pcbi.1010253.s010.pdf]
