# Supplementary material for: Size regulation of multiple organelles competing for a limiting subunit pool
Source: PubMed Central journal article supplement (PMC9246132; doi:10.1371/journal.pcbi.1010253), 2022-06-17

○ unstable

○ stable

● unstable

● stable

⊗ saddle-point

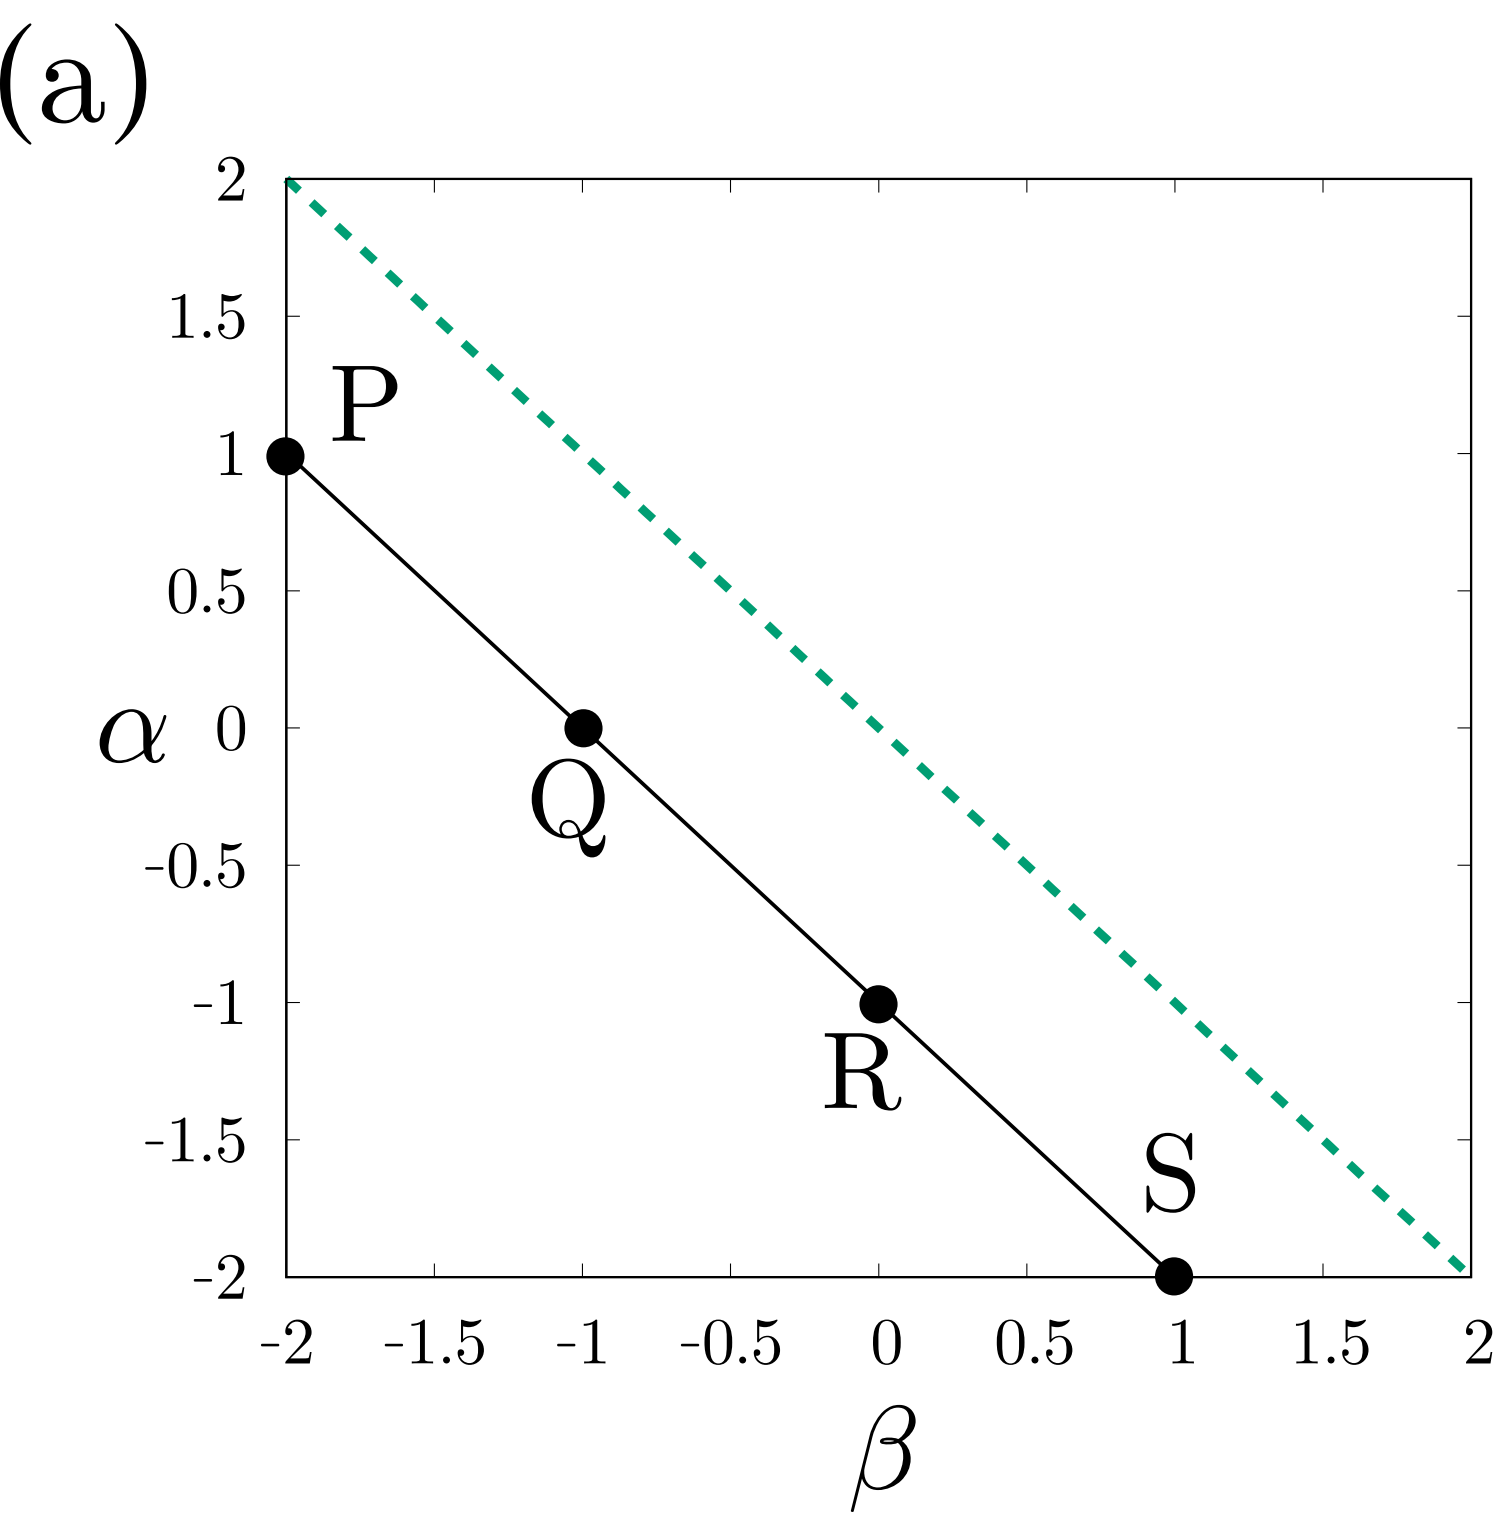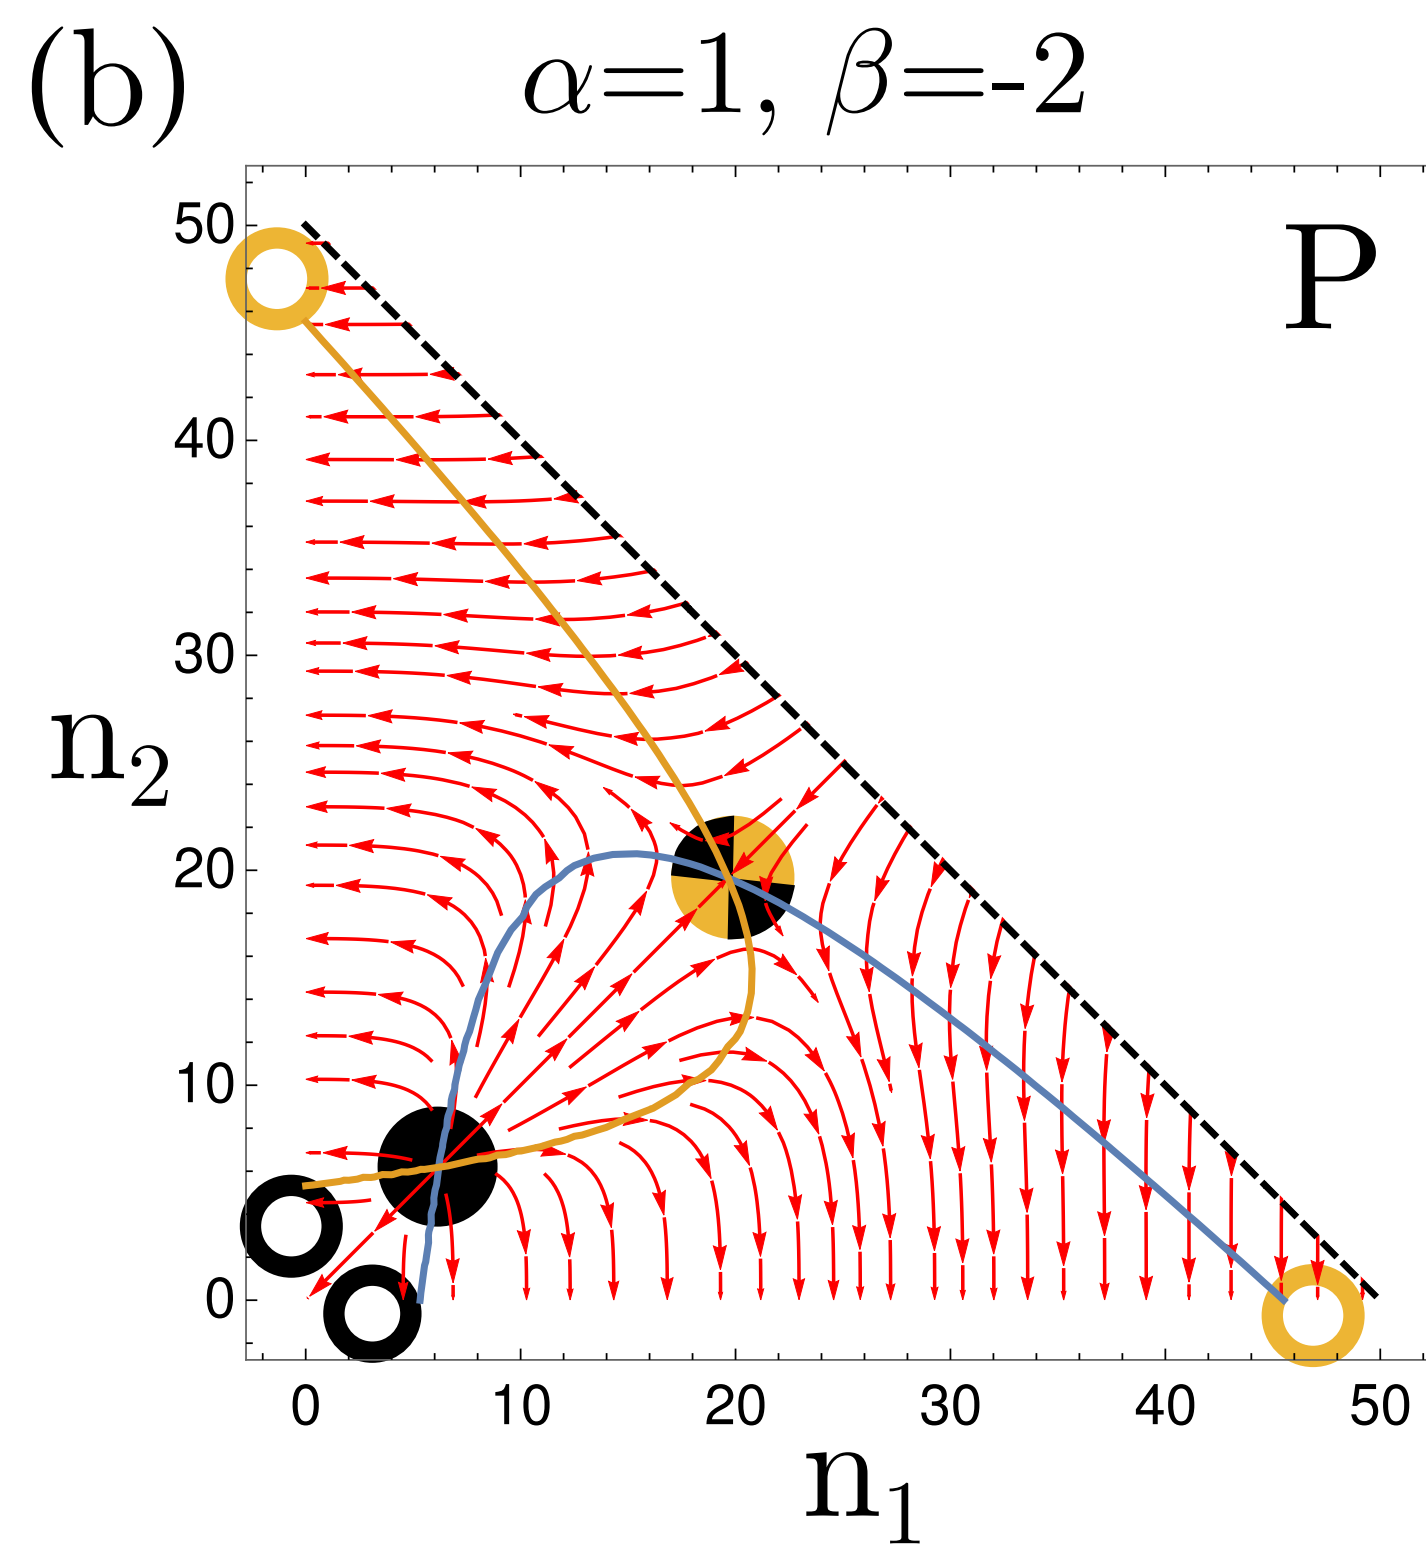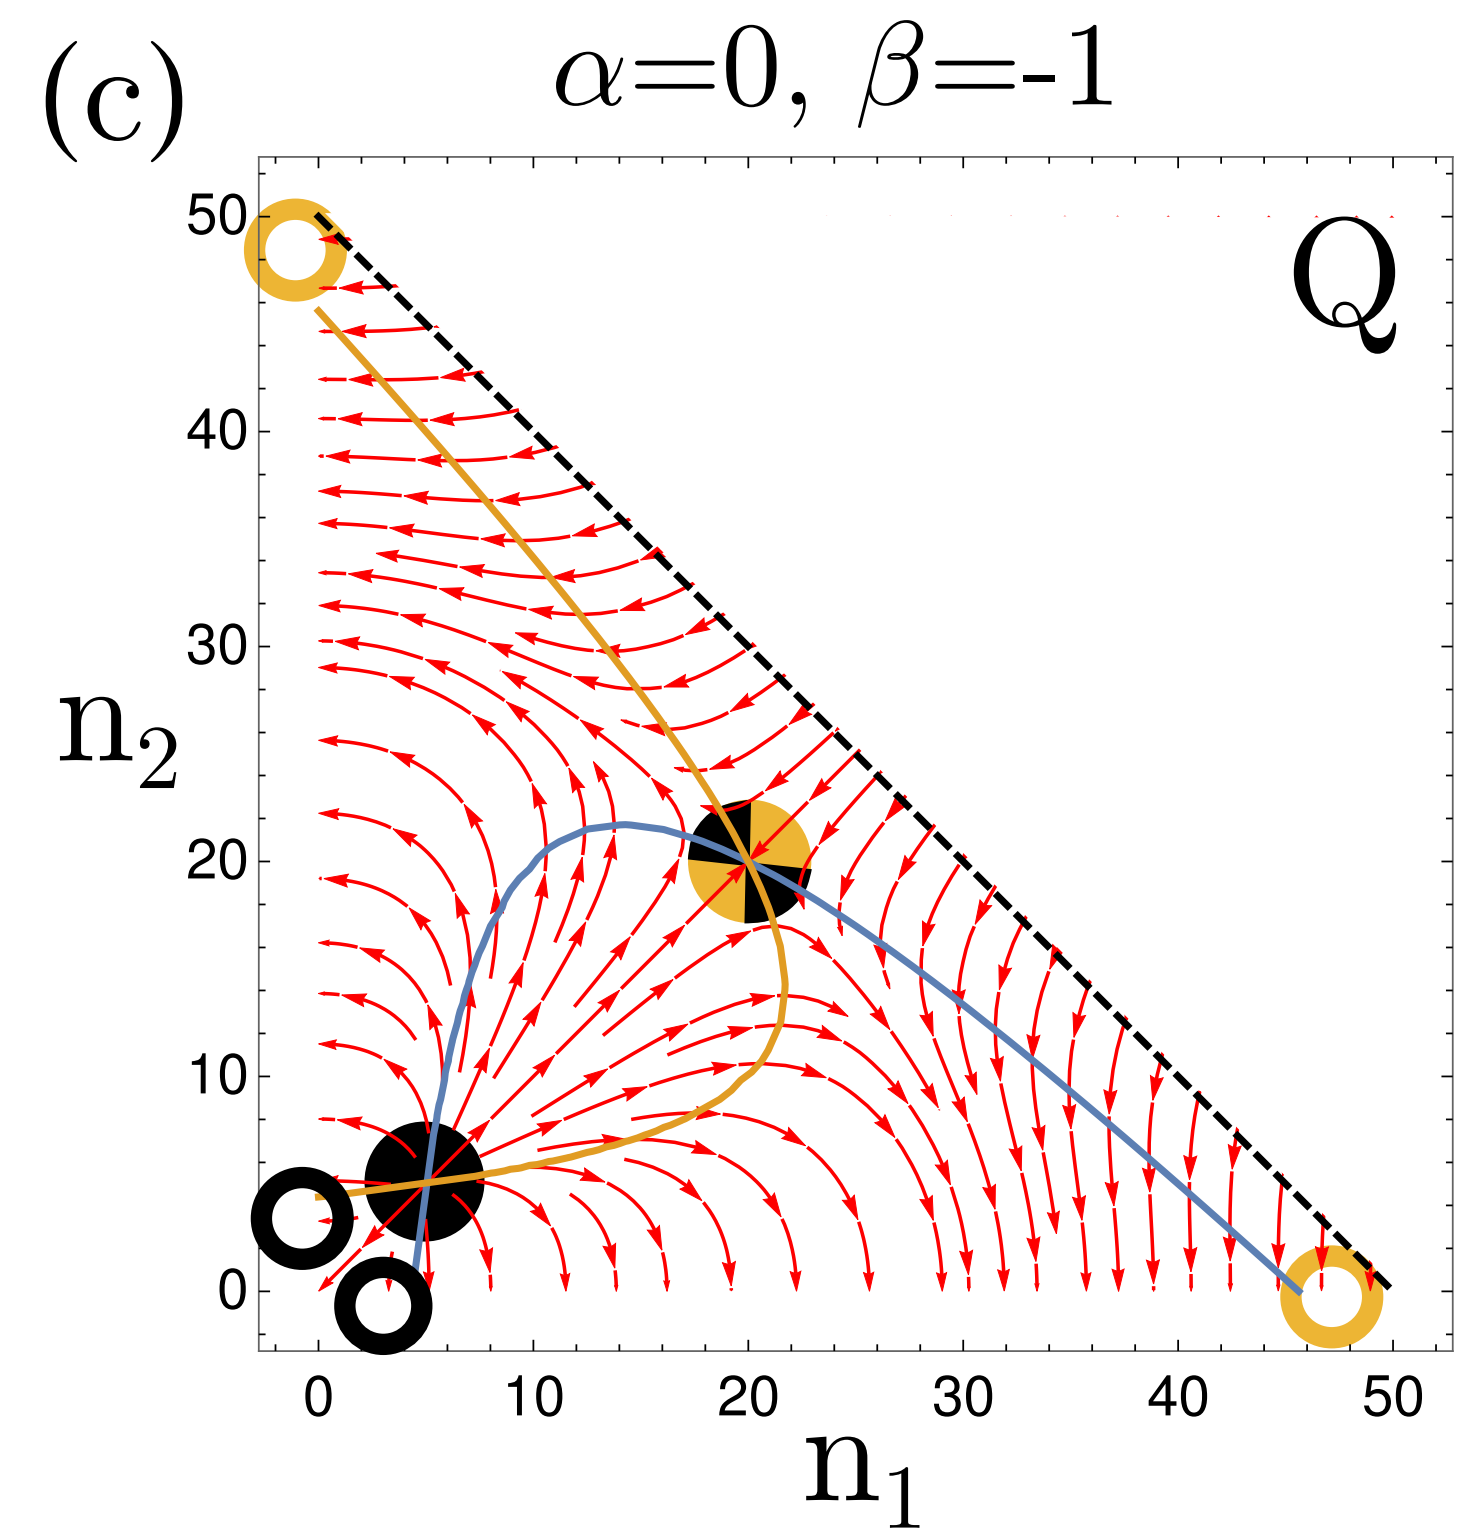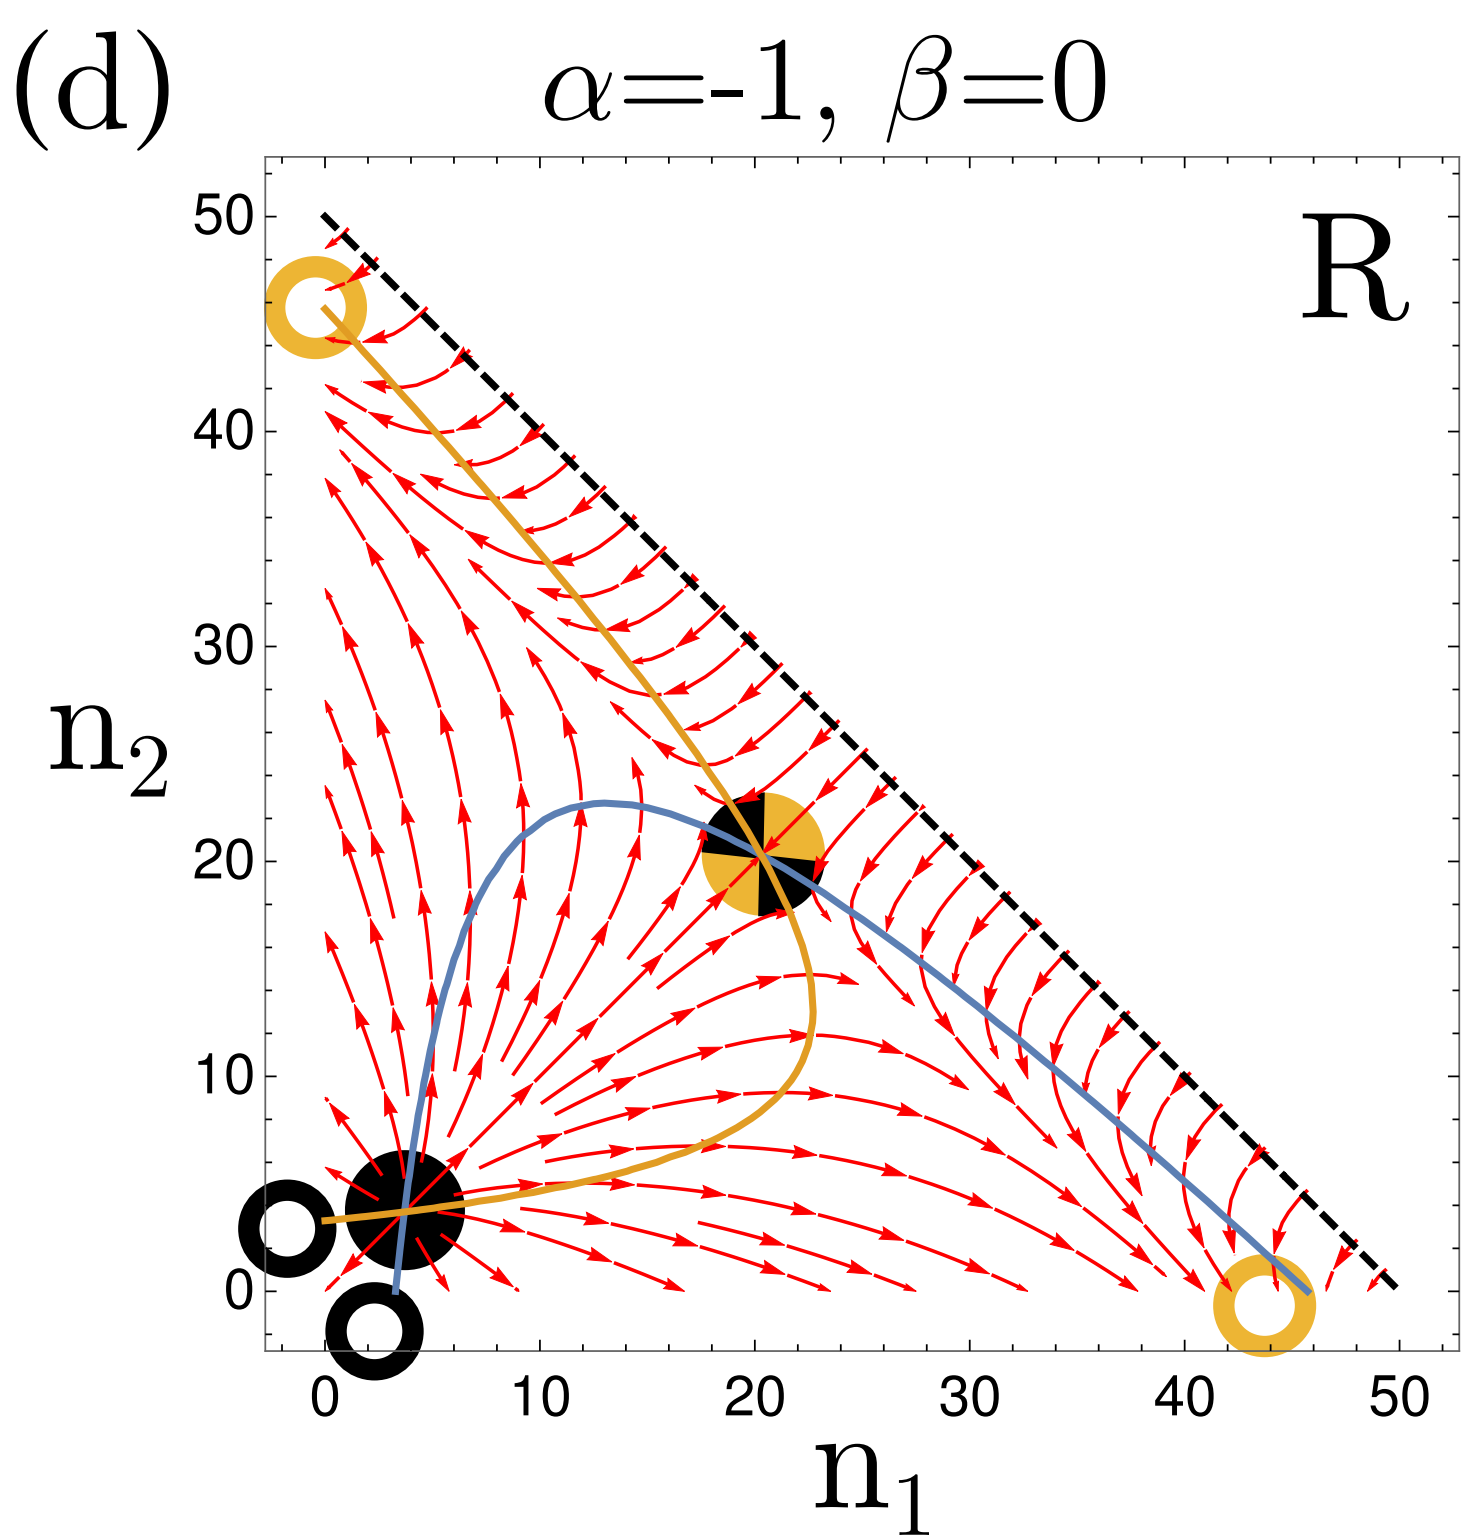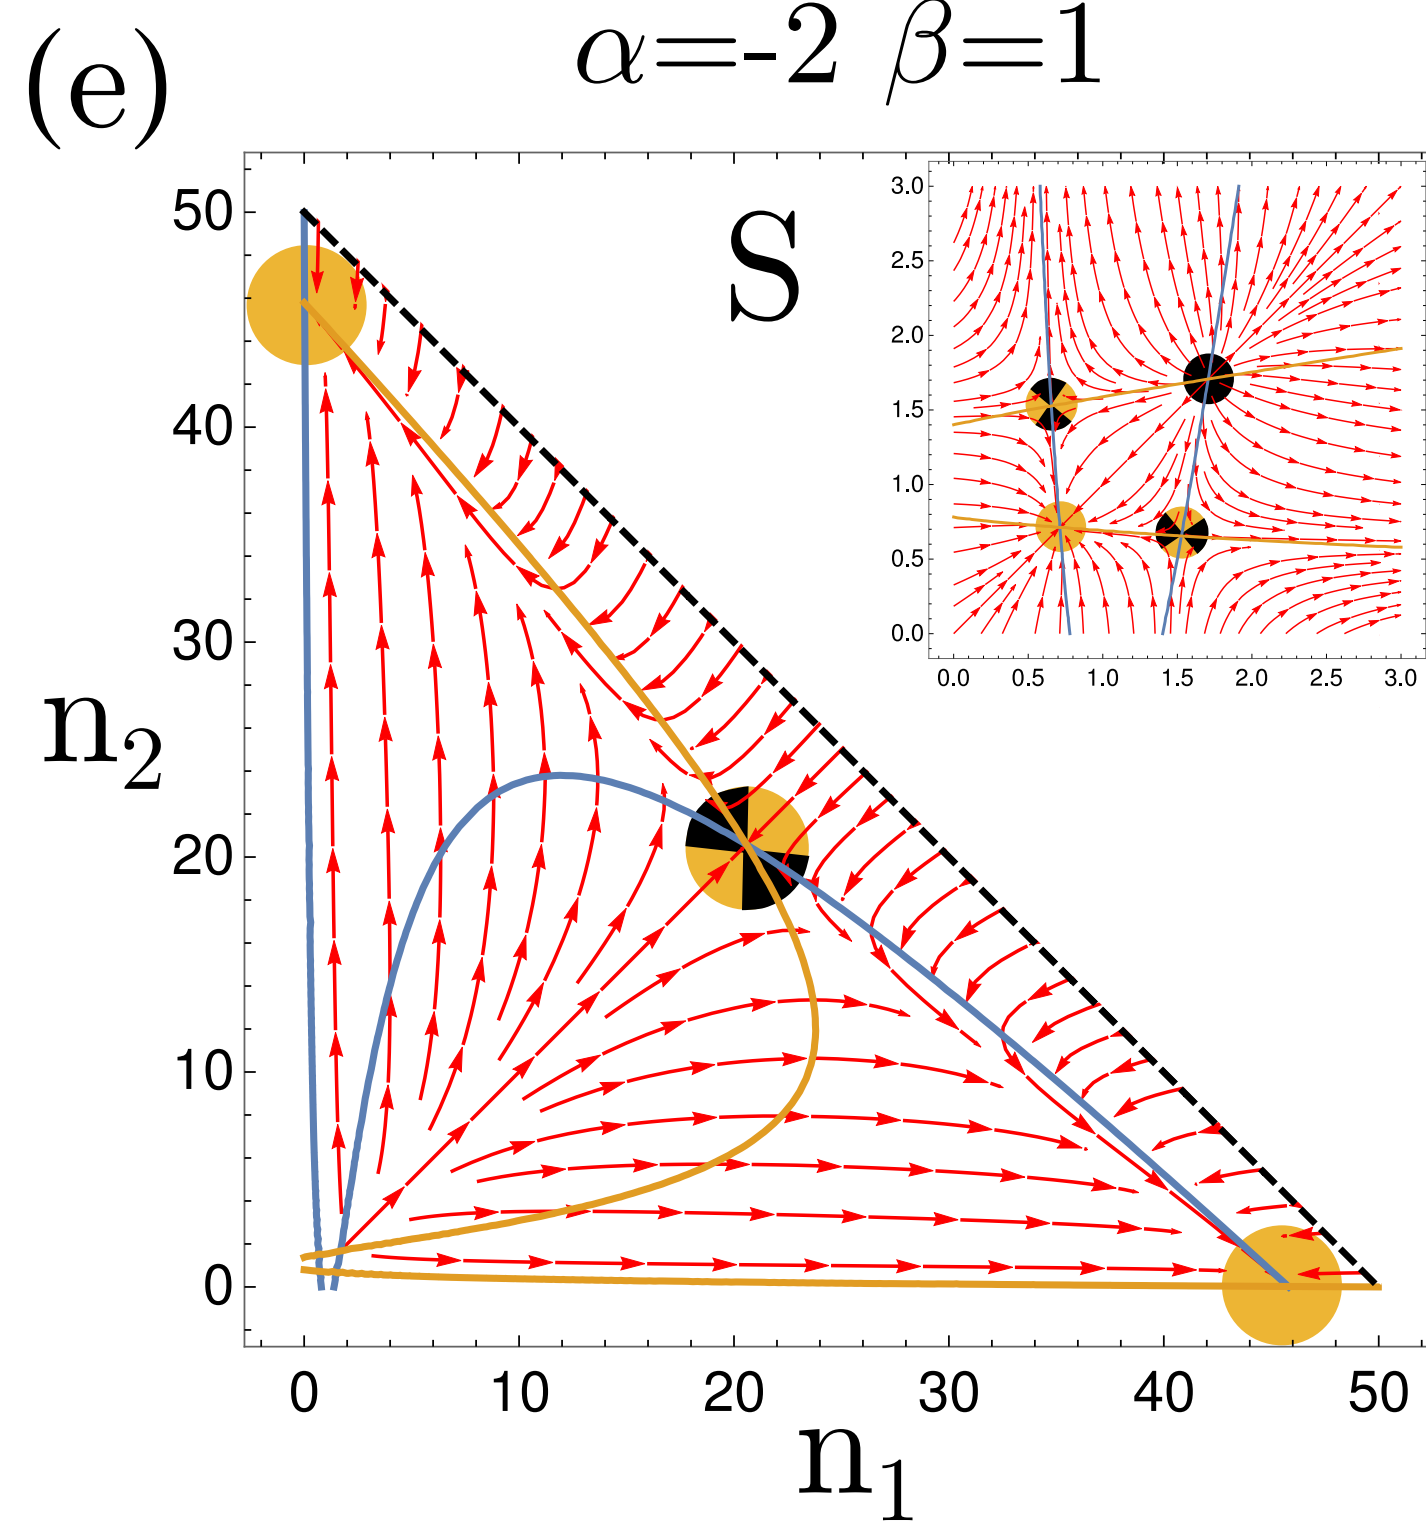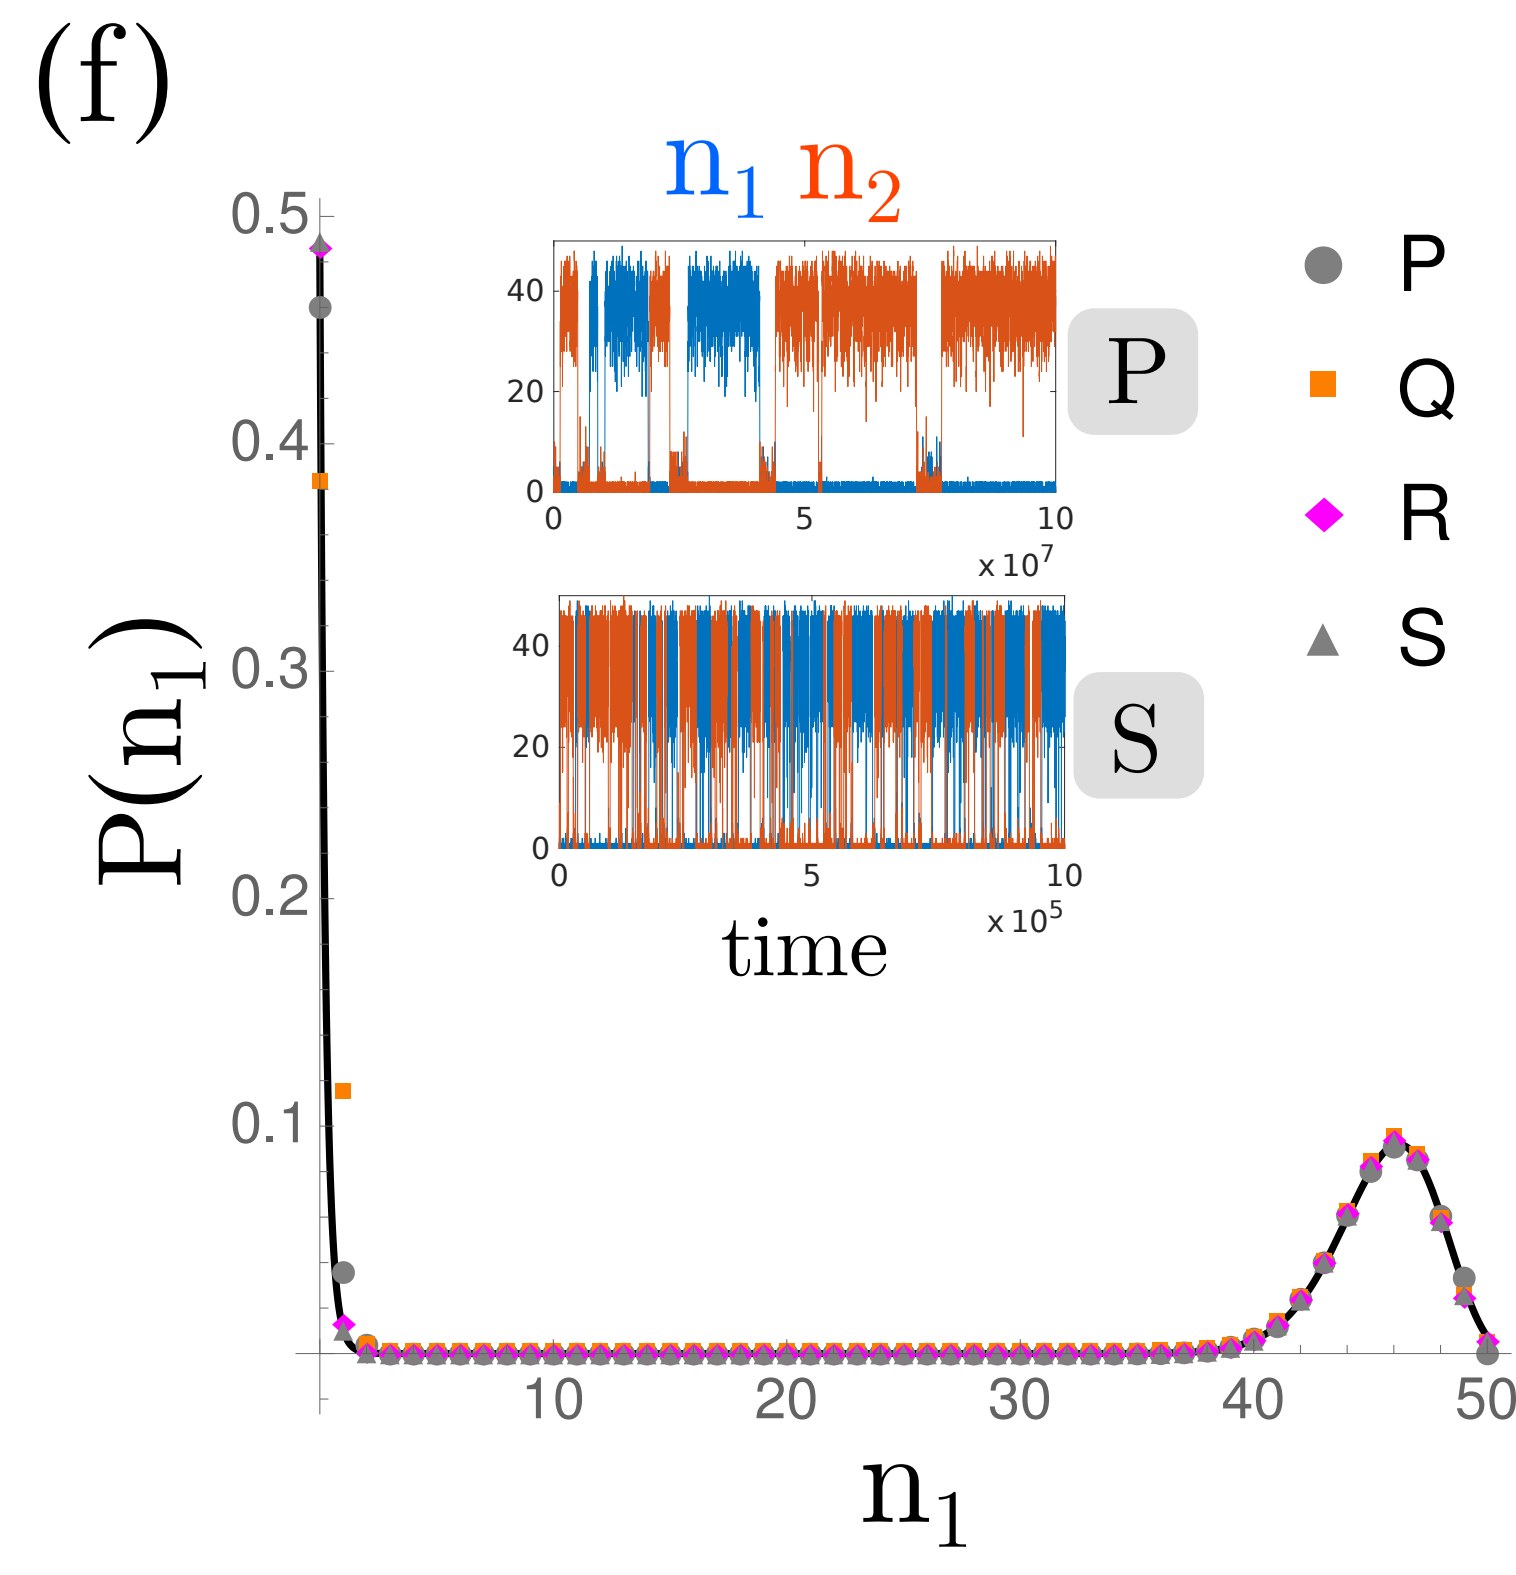

Supplement: pcbi.1010253.s013.pdf [file pcbi.1010253.s013.pdf]
