# Supplementary material for: Size regulation of multiple organelles competing for a limiting subunit pool
Source: PubMed Central journal article supplement (PMC9246132; doi:10.1371/journal.pcbi.1010253), 2022-06-17

M=2

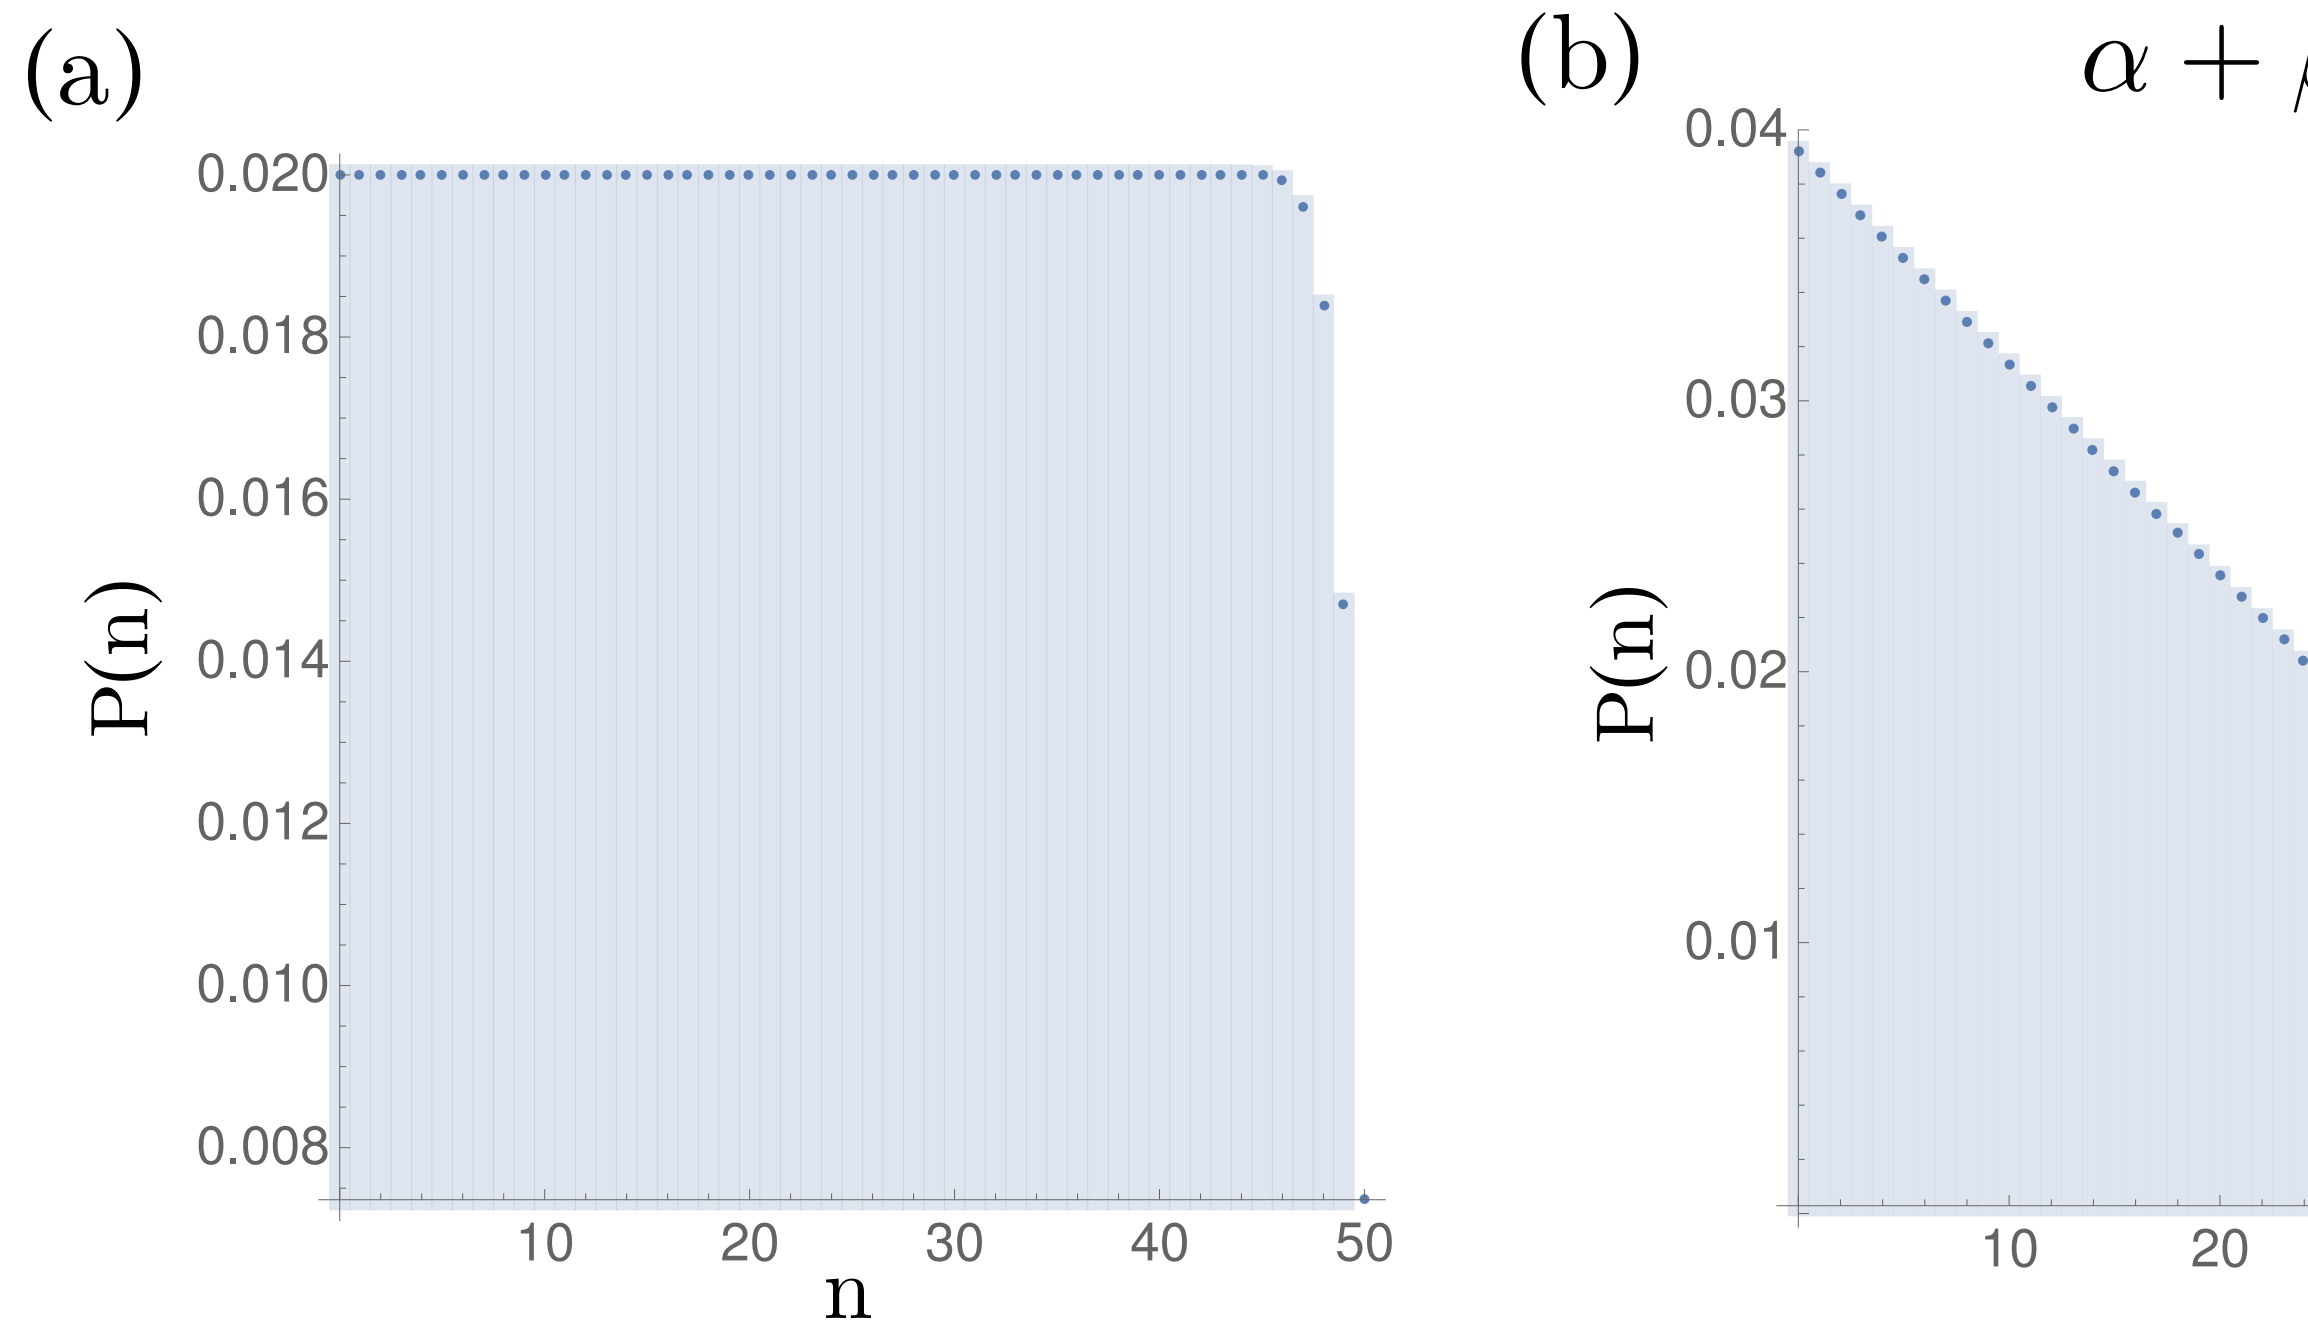

M=3

$\alpha + \beta = 0$

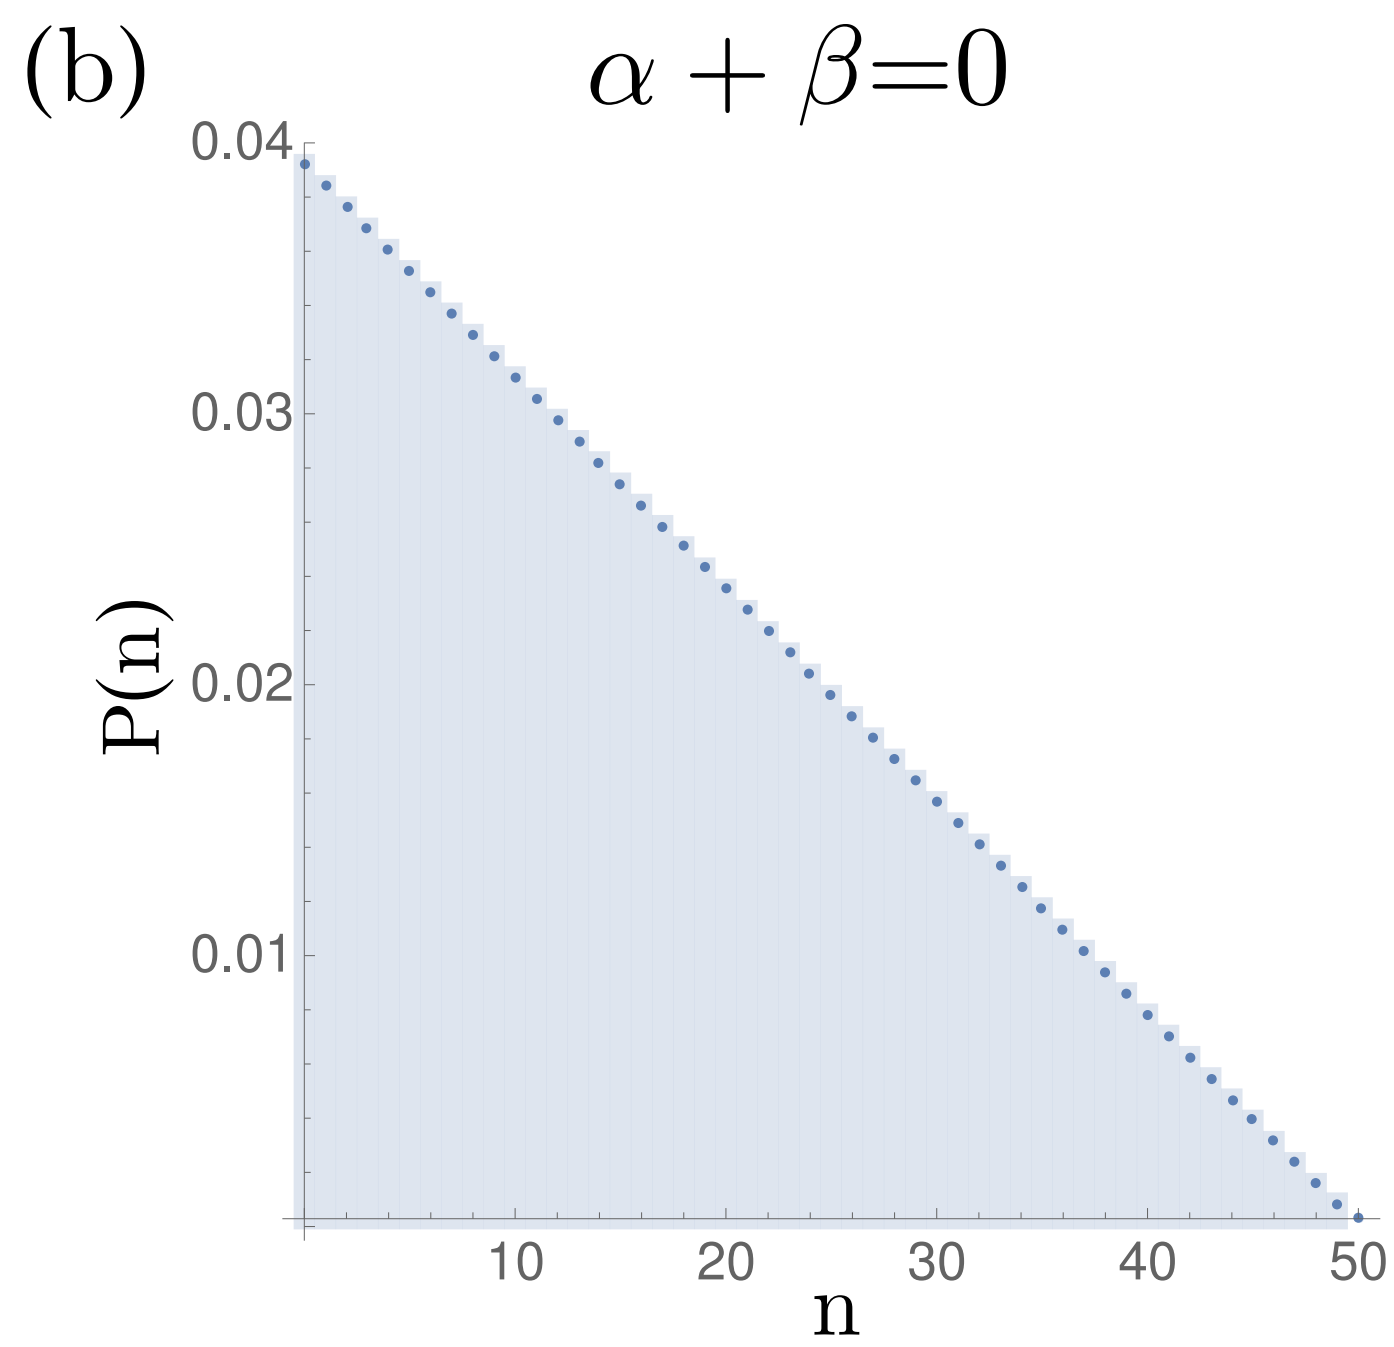

M=4

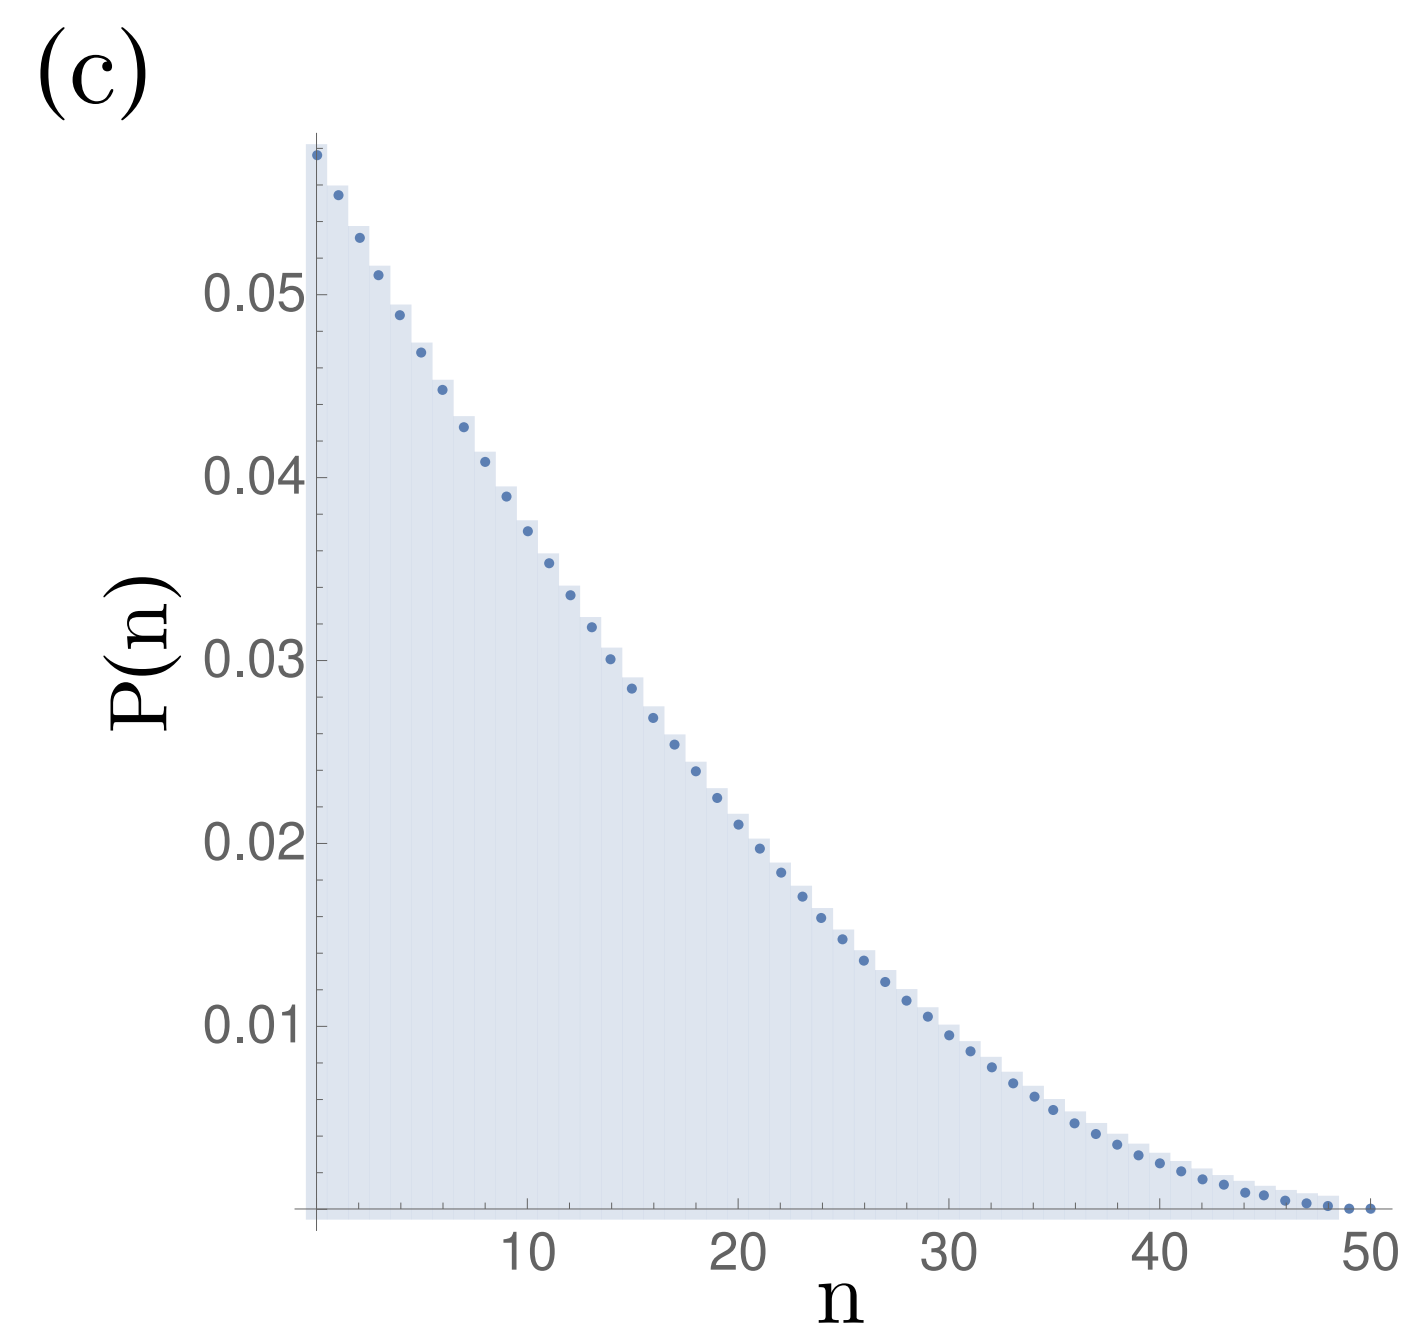

(d)

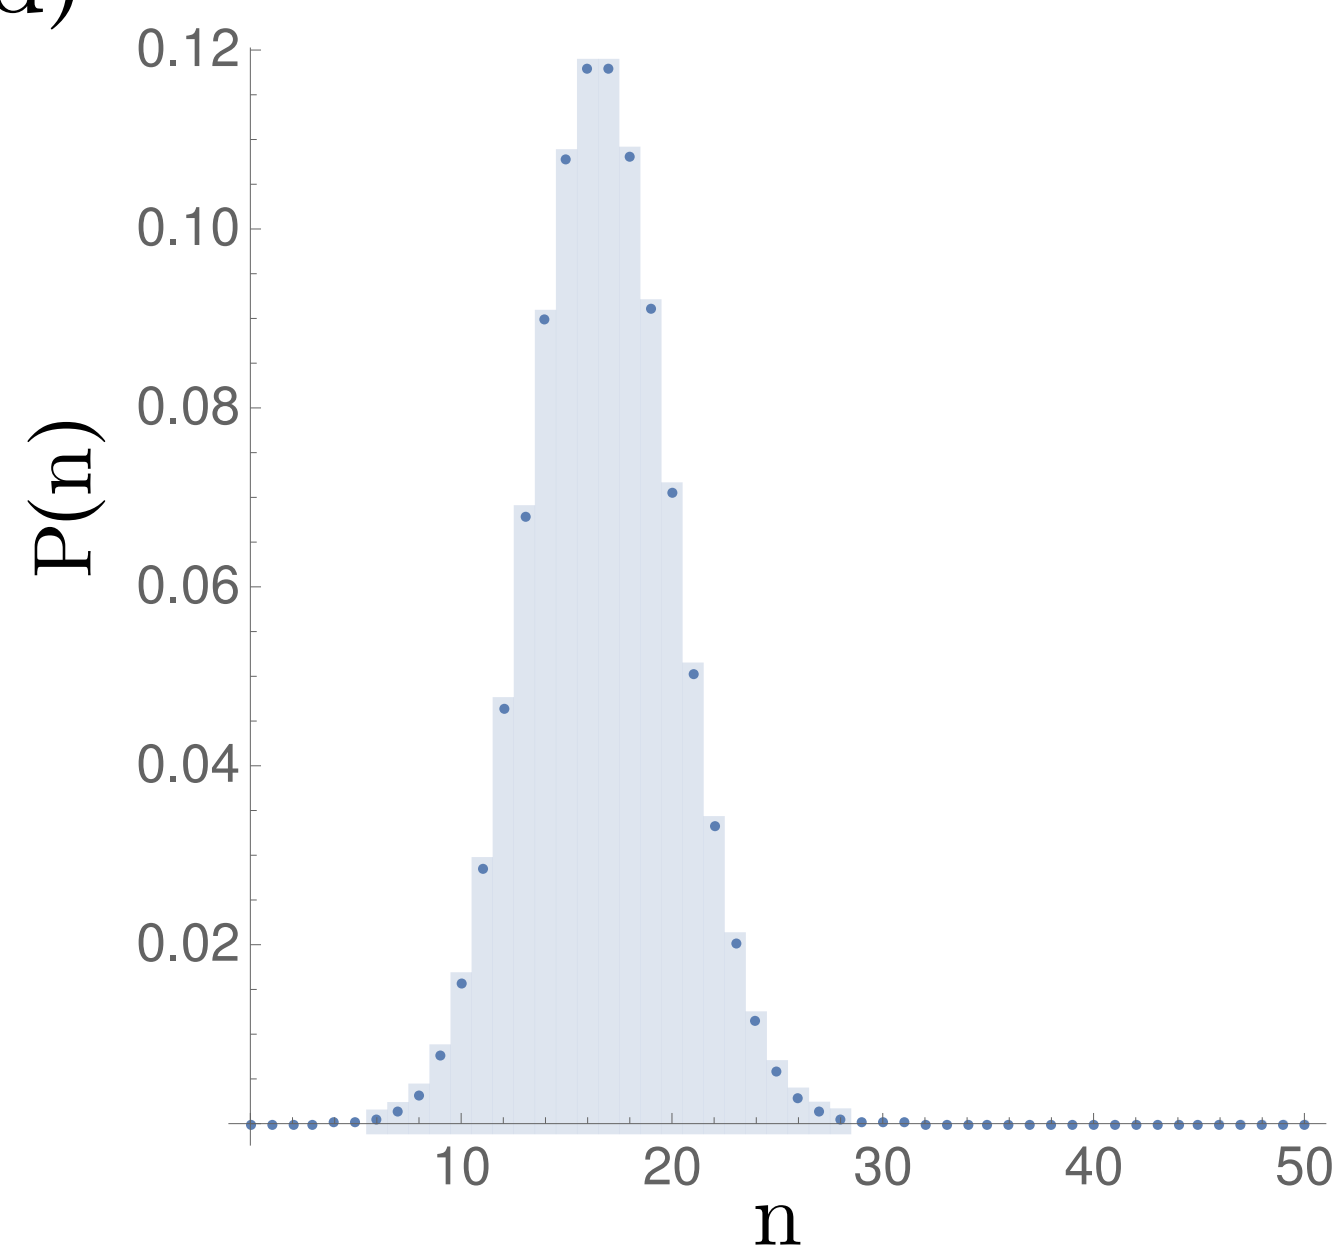

(e)

$\alpha + \beta = 1$

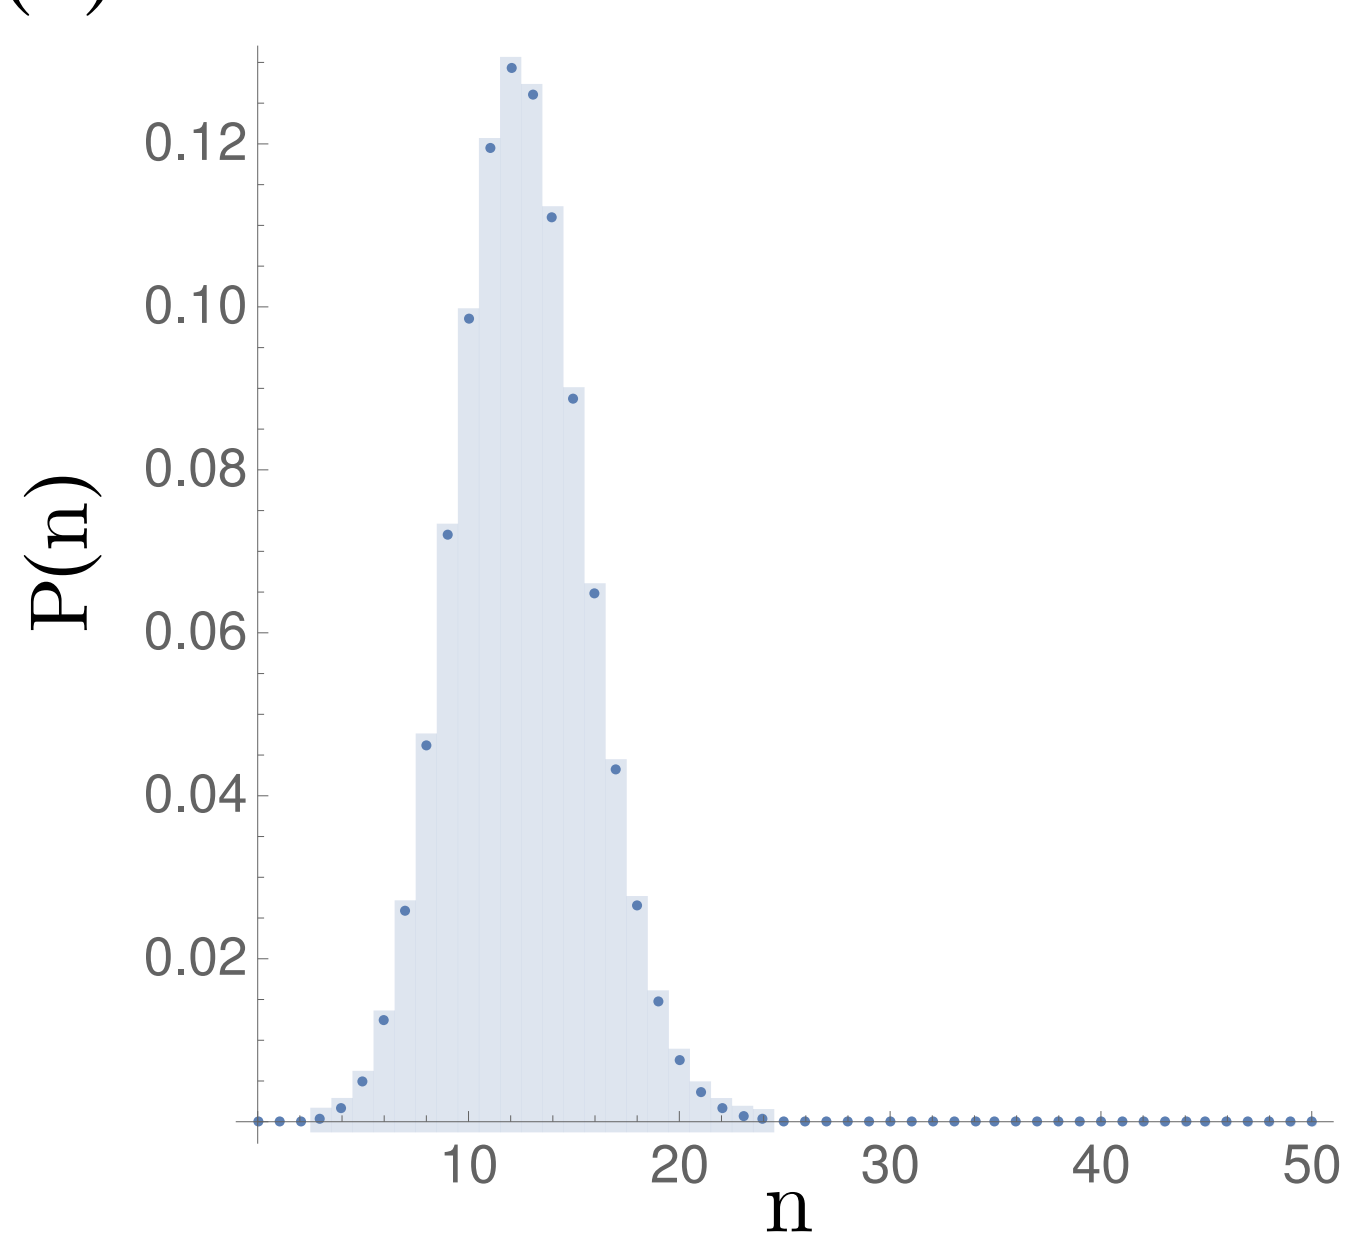

(f)

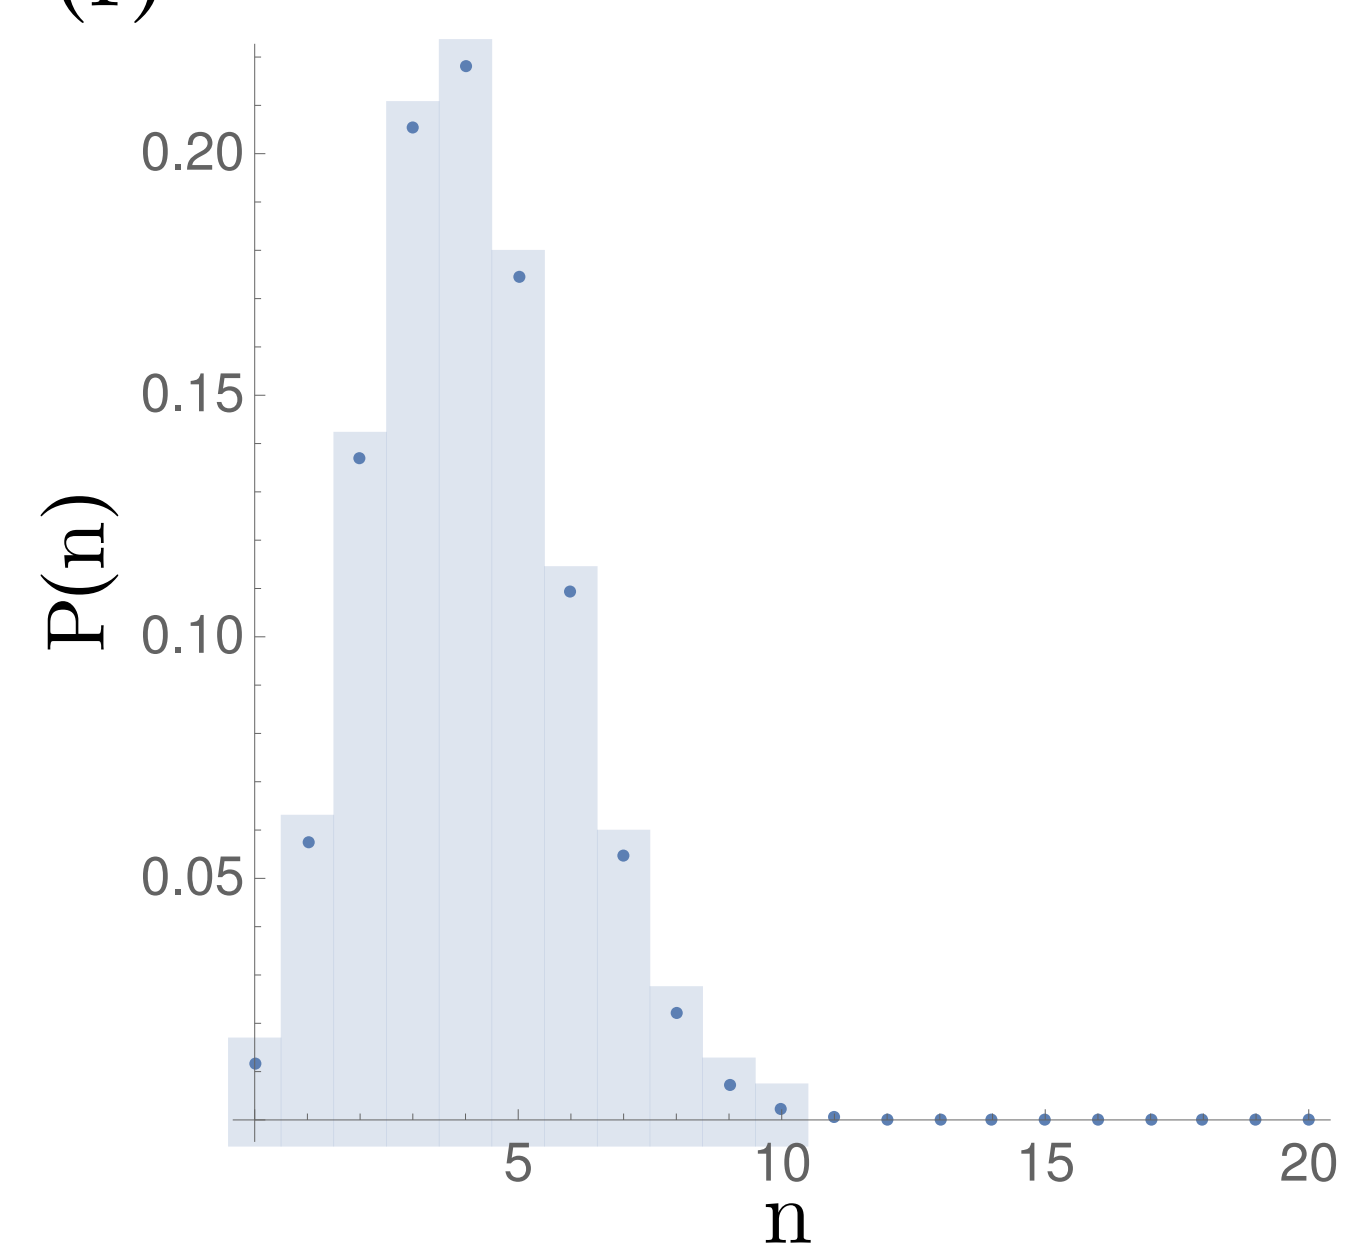

(g)

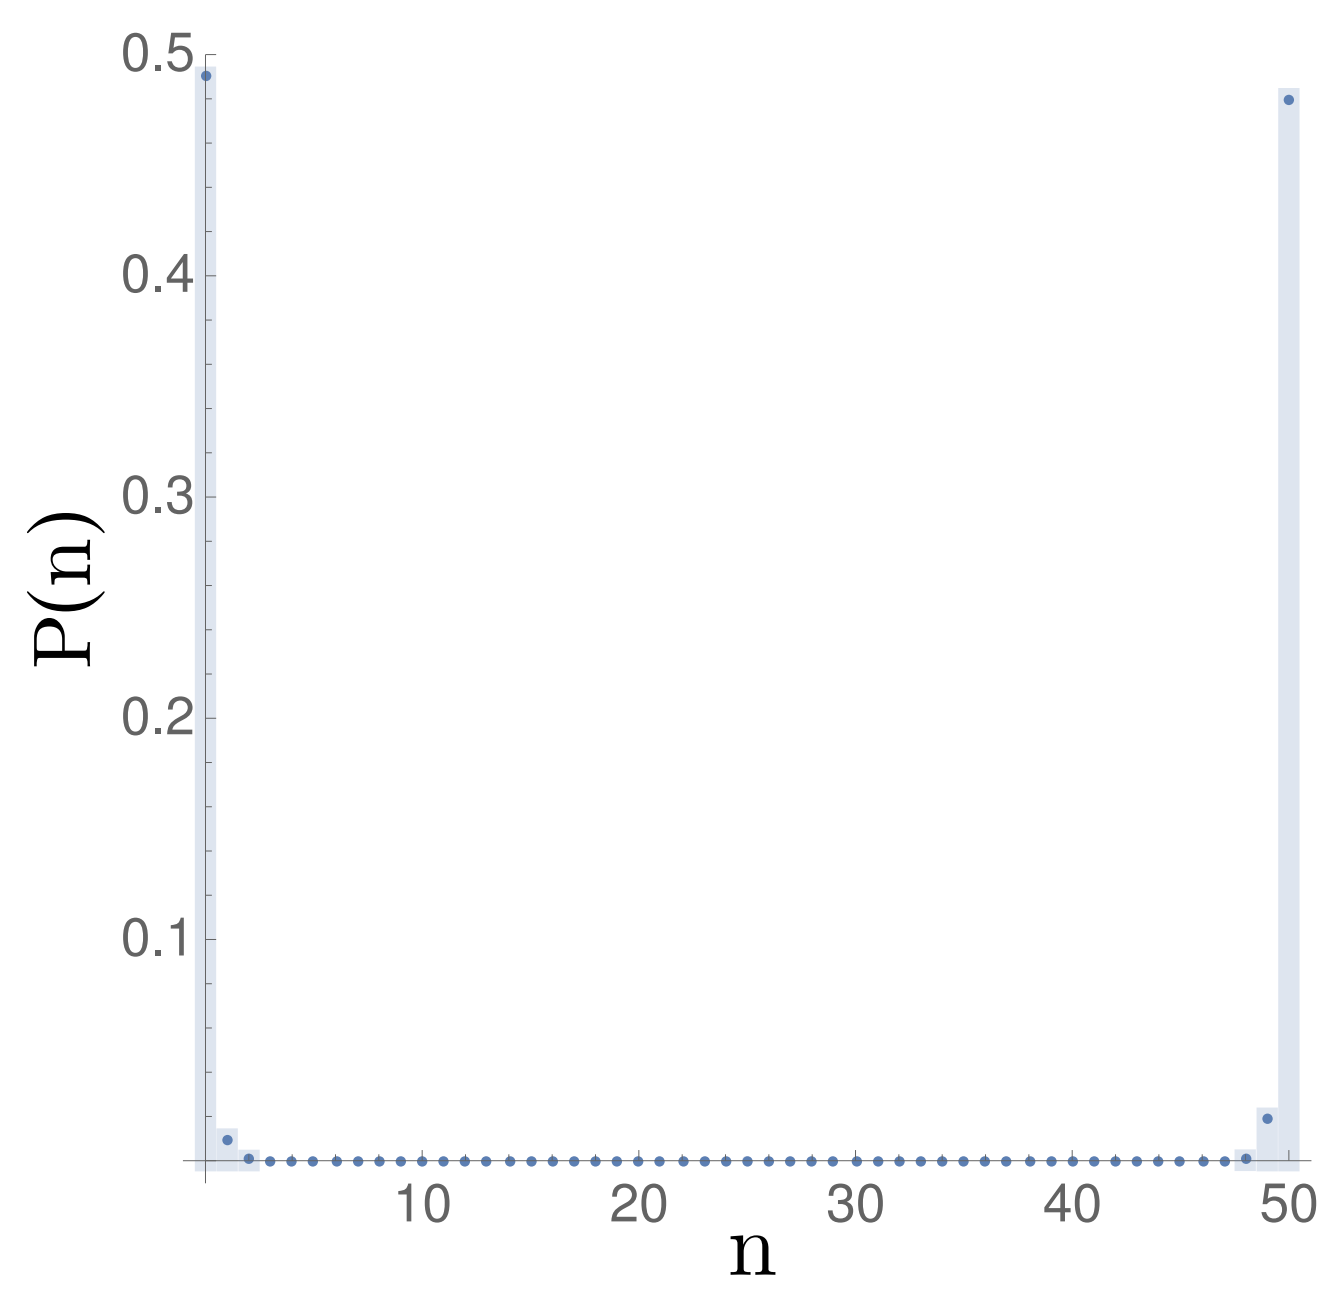

(h)

$\alpha + \beta = -1$

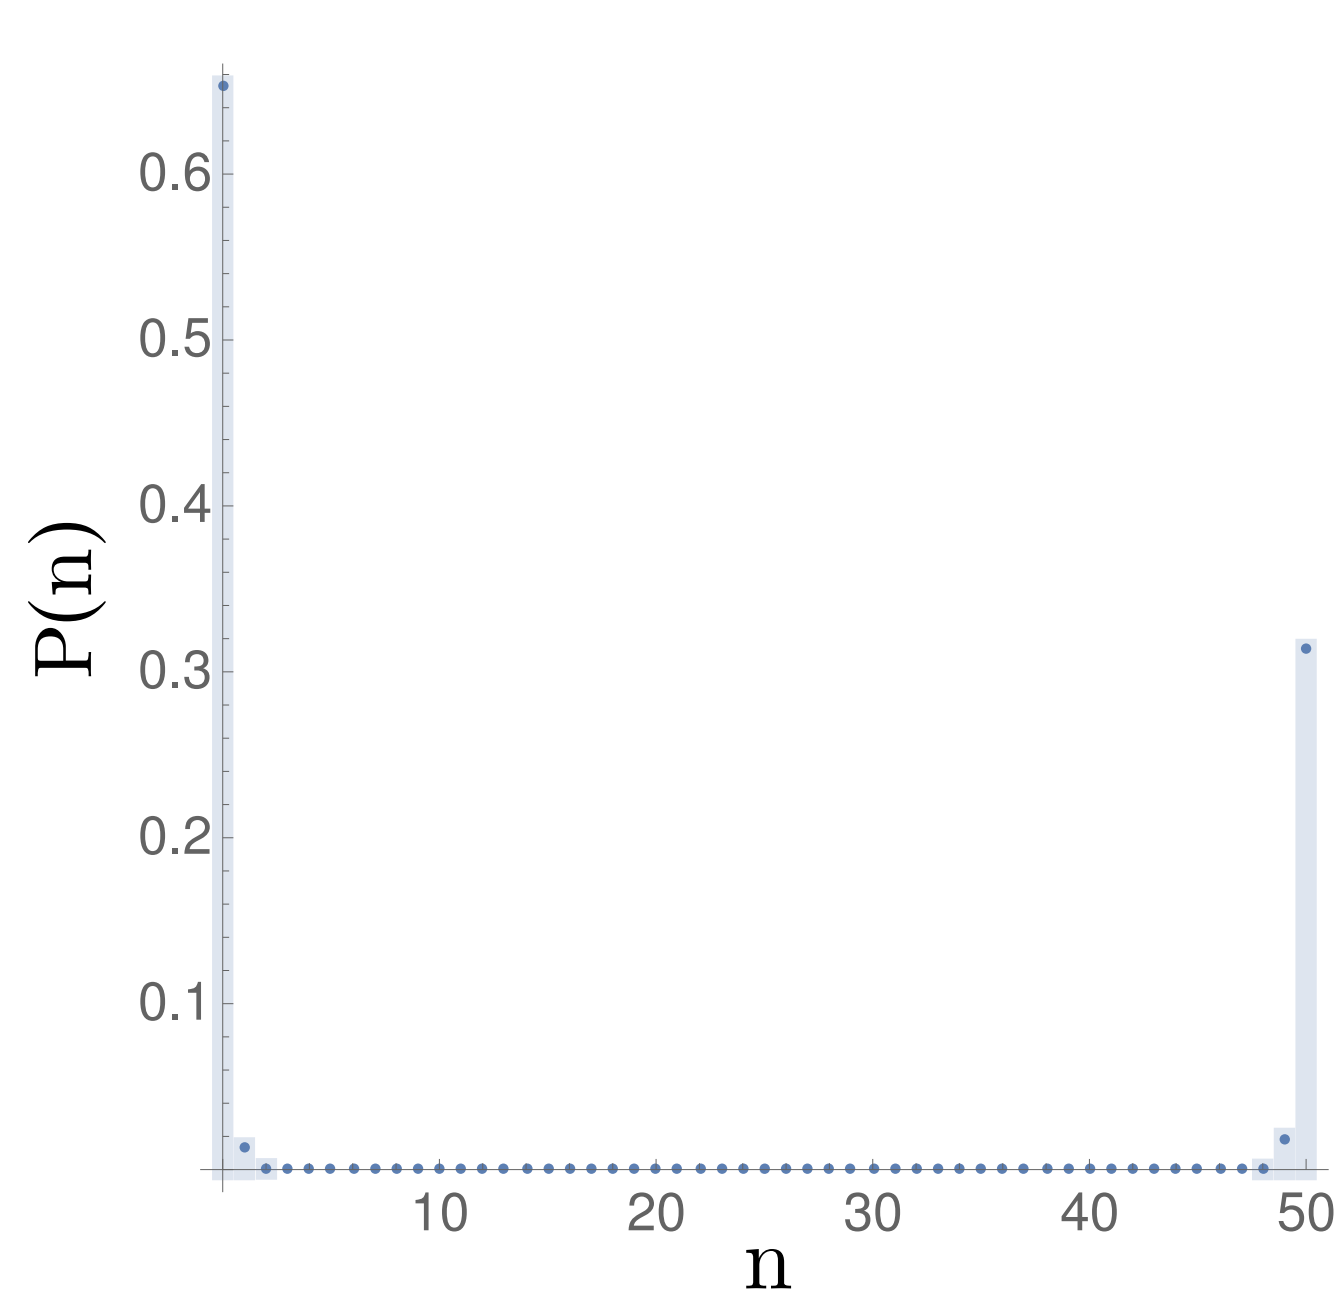

(i)

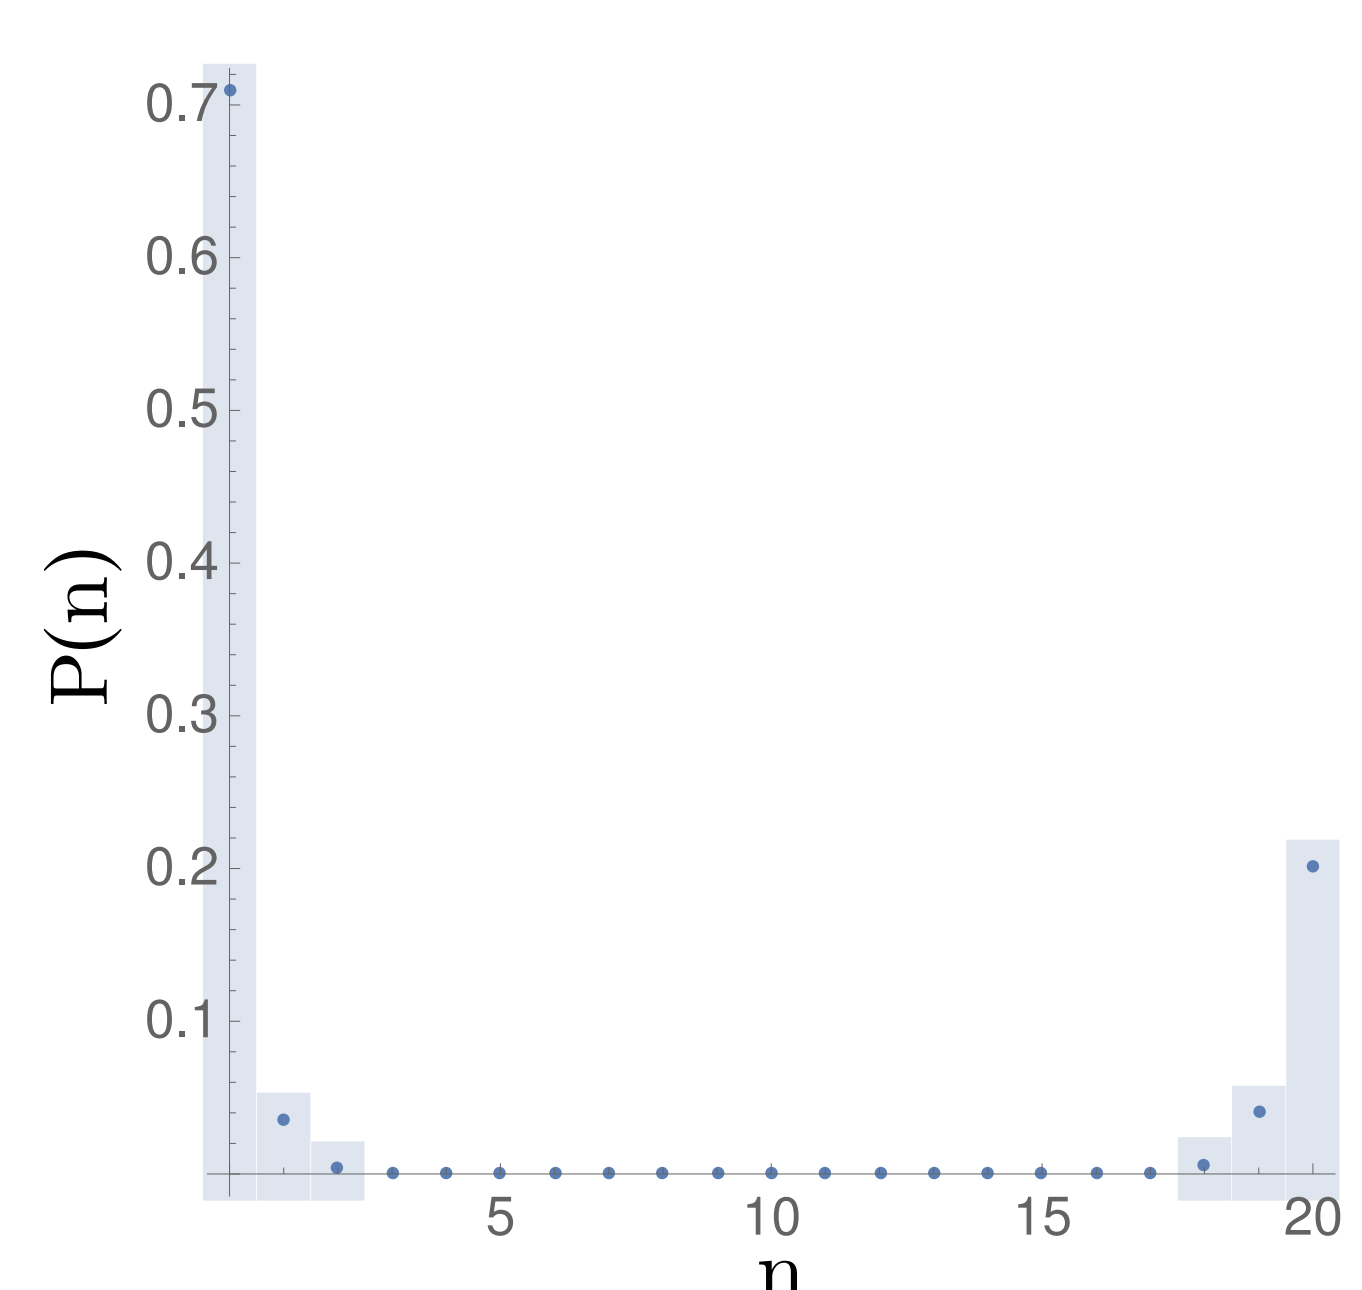

Supplement: pcbi.1010253.s016.pdf [file pcbi.1010253.s016.pdf]
